# Supplementary material for: Deficiencies in healthcare prior to suicide and actions to deal with them: a retrospective study of investigations after suicide in Swedish healthcare
Source: PubMed Central journal article supplement — BMJ Open. 2019 Dec 11;9(12):e032290. doi: 10.1136/bmjopen-2019-032290 (PMC6924838; doi:10.1136/bmjopen-2019-032290), 2019-12-11
Supplement: bmjopen-2019-032290.draft_revisions.pdf [file bmjopen-2019-032290.draft_revisions.pdf]

# BMJ Open

BMJ Open is committed to open peer review. As part of this commitment we make the peer review history of every article we publish publicly available.

When an article is published we post the peer reviewers' comments and the authors' responses online. We also post the versions of the paper that were used during peer review. These are the versions that the peer review comments apply to.

The versions of the paper that follow are the versions that were submitted during the peer review process. They are not the versions of record or the final published versions. They should not be cited or distributed as the published version of this manuscript.

BMJ Open is an open access journal and the full, final, typeset and author-corrected version of record of the manuscript is available on our site with no access controls, subscription charges or pay-per-view fees (<http://bmjopen.bmj.com>).

If you have any questions on BMJ Open's open peer review process please email [info.bmjopen@bmj.com](mailto:info.bmjopen@bmj.com)

# BMJ Open

## A retrospective study of investigations after suicide in Swedish healthcare

|                               |                                                                                                                                                                                                                                                                                                                                                                                                                                                                                                                                                                                                                                                                                                                                                         |
|-------------------------------|---------------------------------------------------------------------------------------------------------------------------------------------------------------------------------------------------------------------------------------------------------------------------------------------------------------------------------------------------------------------------------------------------------------------------------------------------------------------------------------------------------------------------------------------------------------------------------------------------------------------------------------------------------------------------------------------------------------------------------------------------------|
| Journal:                      | <i>BMJ Open</i>                                                                                                                                                                                                                                                                                                                                                                                                                                                                                                                                                                                                                                                                                                                                         |
| Manuscript ID                 | bmjopen-2019-032290                                                                                                                                                                                                                                                                                                                                                                                                                                                                                                                                                                                                                                                                                                                                     |
| Article Type:                 | Research                                                                                                                                                                                                                                                                                                                                                                                                                                                                                                                                                                                                                                                                                                                                                |
| Date Submitted by the Author: | 13-Jun-2019                                                                                                                                                                                                                                                                                                                                                                                                                                                                                                                                                                                                                                                                                                                                             |
| Complete List of Authors:     | Roos af Hjelmsäter, Elin; Region Jönköping, Högländssjukhuset; Jönköping University, Jönköping Academy for Improvement of Health and Welfare, the School of Health and Welfare Jönköping University<br>Ros, Axel; Region Jönköping, Ryhov; Jönköping University, Jönköping Academy for Improvement of Health and Welfare, the School of Health and Welfare Jönköping University<br>Gäre, Boel Andersson; Hogskolan i Jonkoping Halsohogskolan, The Jönköping Academy for Improvement of Health and Welfare; Landstinget i Jonkopings lan, Futurum<br>Westrin, Åsa; Lund University, Faculty of Medicine, Department of Clinical Sciences, Lund, Division of Psychiatry; Region Skåne, Office for Psychiatry and Habilitation, Psychiatry Research Skåne |
| Keywords:                     | Health & safety < HEALTH SERVICES ADMINISTRATION & MANAGEMENT, Quality in health care < HEALTH SERVICES ADMINISTRATION & MANAGEMENT, Risk management < HEALTH SERVICES ADMINISTRATION & MANAGEMENT, Adult psychiatry < PSYCHIATRY, Suicide & self-harm < PSYCHIATRY                                                                                                                                                                                                                                                                                                                                                                                                                                                                                     |
|                               |                                                                                                                                                                                                                                                                                                                                                                                                                                                                                                                                                                                                                                                                                                                                                         |

SCHOLARONE™  
Manuscripts

1  
2  
3 **Title page**  
4  
5  
6  
7

8 **A retrospective study of investigations after suicide in Swedish healthcare**  
9  
10  
11  
12  
13  
14  
15

16  
17 **Corresponding author:**

18 Elin Roos af Hjelmsäter, MD

19 Högländssjukhuset, hus 34 pl 4

20  
21 575 82 Eksjö

22  
23 Sweden

24  
25 [elin.roos.af.hjelmsater@rjl.se](mailto:elin.roos.af.hjelmsater@rjl.se), phone number: +46703577396  
26  
27

28  
29  
30  
31 **Co-authors:**

32 Boel Andersson Gäre, MD, PhD, Professor, Jönköping Academy for Improvement of Health and  
33 Welfare, the School of Health and Welfare Jönköping University, Jönköping and Futurum, Region  
34 Jönköping County, Jönköping, Sweden

35  
36 Axel Ros, MD, PhD, Region Jönköping County and Jönköping Academy for Improvement of Health  
37 and Welfare, the School of Health and Welfare Jönköping University, Jönköping, Sweden

38  
39 Åsa Westrin, MD, PhD, Professor, Department of Clinical Sciences, Lund, Division of Psychiatry,  
40 Lund University and Psychiatry Research Skåne, Office for Psychiatry and Habilitation, Region  
41 Skåne, Sweden  
42  
43  
44  
45  
46  
47  
48  
49  
50

51 **Word count** (excluding title page, abstract, references, figures and tables): 3994. Abstract: 274.  
52  
53  
54  
55  
56  
57  
58  
59  
60

## ABSTRACT

### Background

Many suicide deaths occur among individuals who have ongoing contact with healthcare services. Despite more than a decade of intensive efforts to increase the safety of suicidal patients through healthcare in Sweden, the suicide rate has remained relatively unchanged.

### Methods

Reports to the regulatory authority in Sweden after investigations of the healthcare provided to individuals who died by suicide in 2015 were examined (n=436). Reported deficiencies in healthcare, immediately performed actions, and non-immediate actions were categorized via a coding scheme and at organizational micro-meso-macro levels. The supervisory authority decisions were coded as “immediate approval,” “request for addition,” or “inspection.”

### Results

In 55% (n=240) of cases, healthcare providers reported healthcare deficiencies that contributed to suicide; these deficiencies were primarily in “suicide risk assessment” and “treatment.” Actions aimed at preventing new suicides were proposed in 80% of cases (n=347). By far, the most frequent actions were “education and competence,” present in 52% of cases (n=227) and did not much correspond with identified deficiencies. Sixty-five percent of the deficiencies and actions were at micro level, while the remainders were at meso level. In 65% (n=284) of cases, the supervisory authority approved the investigation without further requirements.

### Conclusions

The most common identified deficiencies were related to care in the immediate interface between patient and staff. Actions proposed to prevent new suicides were centered on single educational interventions without distinctive sustainable effects in the organizations and usually did not correspond with the identified deficiencies. Future research should examine if application of a framework based on knowledge of the suicide process, suicide prevention strategies, and patient safety would enable more sophisticated investigations that could facilitate progress on suicide prevention.

### Article summary

Strengths and limitations of this study

- This is the first national aggregated analysis of the outcomes of investigations following suicides in Sweden.
- The categorization of deficiencies and actions for improvements was done by a single person to improve consistency.
- The majority of the suicides in Sweden were not reported to the supervisory authority, probably because not receiving healthcare close in time before death, and these suicides are therefore not included in this study.
- All data were based on the healthcare providers’ reports of suicide to the supervisory authority, reports performed in different contexts by different persons with a large spectrum of disparities in experiences resulting in variegated quality

## BACKGROUND

Close to 800 000 people die by suicide worldwide every year.<sup>1</sup> Studies show that approximately nine out of ten individuals who die by suicide have a psychiatric disorder at the time of death, and a large proportion of suicide deaths occur among individuals receiving ongoing psychiatric care or who have contact with other healthcare providers.<sup>2-5</sup> There is some evidence that suicide prevention strategies diminish suicide rates<sup>6 7</sup>; however, despite intensified efforts to improve the healthcare safety for suicidal patients, the suicide rate has remained essentially the same in Sweden, at approximately 1200 deaths every year.<sup>8</sup> In recent decades, awareness and knowledge of patient safety has increased. Many countries have established an incident reporting system, meaning that serious adverse events are to be investigated and reported to a supervisory authority. To better understand if failures in the healthcare system have contributed to suicide, all suicides that occurred while a victim was receiving healthcare or within four weeks after healthcare contact were required to be reported to the supervisory authority for healthcare in Sweden in 2006-2017. A review conducted one year after this obligation was implemented showed that the supervisory authority criticized healthcare providers for healthcare deficiencies in 53% of cases, with the most frequent deficiencies being in routines and risk assessments.<sup>9</sup> Since that report, no further national aggregated analysis of the outcomes of the investigations following suicides has been done.

Investigations based on root cause analysis (RCA) have become wide-spread tools in healthcare services efforts to understand and prevent adverse events.<sup>10 11</sup> The principle of RCA is to identify and rectify underlying system vulnerabilities that allow human errors to cause harm to patients.<sup>12</sup> This approach assumes that adverse outcomes can be explained by linear cause-effect chains and have causes that can be found and fixed, and that the actions preceding adverse events differ from those that precede ordinary, successful care.<sup>13</sup> The actual value of incident reporting systems and the RCA approach in healthcare is subject to debate.<sup>14-18</sup> Single analyses usually provide little learning beyond the involved staff and unit. Rather, aggregation of data from multiple analyses should generate more meaningful action plans for improvement and better facilitate the learning processes in organizations.

Swedish law states that when an adverse event has resulted or could have resulted in severe patient harm, this should be reported to the supervisory authority, the Health and Social Care Inspectorate (HaSCI). The role of HaSCI is to "...ensure that reported adverse events have been investigated to a necessary extent, and that appropriate actions have been taken by the healthcare provider to reach a high level of patient safety".<sup>19</sup> The report to the authority is to be preceded by an investigation of the healthcare services provided to the patient before the adverse event, conducted by the healthcare provider. The head of the departments are formally responsible for the investigation and investigators can be any type of healthcare professional. The investigations aim to identify the causes and contributory causes of the incident and to identify improvements that should prevent the same incident from happening again. A distinction is made in investigations between actions performed immediately after an incident and non-immediate actions proposed or taken some time afterwards. The authority then examines the investigation and decides if the healthcare provider has fulfilled their legislated role of investigating the incident and taking actions to ensure patient safety. If there are shortcomings in the investigation, the HaSCI calls for additions or conducts a site visit to inspect the healthcare provider.

The overall aim of this study was to aggregate the conclusions of all investigations conducted after suicides reported to the supervisory authority in Sweden in 2015, and to identify deficiencies in healthcare found in these investigations; the actions proposed to deal with the deficiencies; the level of

the organizational hierarchy (micro-meso-macro) in which the deficiencies and actions were situated; and outcomes of the supervisory authority's decisions.

## METHODS

### Cases

All suicide cases reported to the HaSCI in 2015 were included. Complete incident investigations from healthcare providers with associated patient records and decisions of the supervisory authority were obtained from the supervisory authority. Every individual suicide was given a code number and the patient's demographic data and contact with all areas of healthcare in the three months before death were registered.

### Categorization of data

A coding scheme was used to categorize the causes and contributory causes of the suicide, as well as the immediately performed actions and non-immediate actions reported in the investigations. The coding scheme was based on the general categories of the most widespread method of investigating adverse events in Swedish healthcare, which is based on RCA.<sup>20</sup> The categories were as follows: Education and competence, Communication and information, Organization and management, Technics and equipment, and Policies and procedures. To make the categorization more specific, four of the major categories were divided into additional subcategories. Every category was described and exemplified and a category of "others" was added in case none of the other categories was considered appropriate (*Table 1*). Since the providers rarely made a distinction between causes and contributory causes in the investigations, these are reported as *deficiencies* in this paper. In this study, an action (immediate or non-immediate) was defined as an intervention that aimed to prevent new suicides. Therefore, actions taken to prevent reported suicides (telephone calls, resuscitations) or actions aimed at informing family or staff that a suicide has occurred were not registered as actions in this study. Separate notes were made when a deficiency or action was related to routines and if patient-related factors were reported. In cases where different providers reported the same suicide case, the outcomes of the investigations were grouped. Identical deficiencies or actions reported by different providers regarding the same patient were excluded, thus ensuring that every factor was counted only once. All data collection and categorization was conducted by only one researcher, an experienced psychiatrist, to achieve consistency.

**Table 1. Coding scheme for categories with examples of deficiencies and actions**

| Category and definition                                                                                                                                             | Examples of deficiencies                                                                                                                                                                                      | Examples of actions                                                                                                                                                                                            |
|---------------------------------------------------------------------------------------------------------------------------------------------------------------------|---------------------------------------------------------------------------------------------------------------------------------------------------------------------------------------------------------------|----------------------------------------------------------------------------------------------------------------------------------------------------------------------------------------------------------------|
| <b>Communication and information</b>                                                                                                                                |                                                                                                                                                                                                               |                                                                                                                                                                                                                |
| <b>Communication with peers and family</b>                                                                                                                          |                                                                                                                                                                                                               |                                                                                                                                                                                                                |
| Deficiencies and actions related to cooperation, communication, information, and interaction between the healthcare provider and the families and peers of patients | Shortcomings in provision of adequate information about healthcare from provider to family/peers<br>Absence of or inadequacies in the providers' contact with family/peers at time of discharge from hospital | New routines for involving family/peers in healthcare<br>New written information about psychiatric disorders and treatment<br>"Courses" or lectures for family/peers about psychiatric disorders and treatment |
| <b>Documentation</b>                                                                                                                                                |                                                                                                                                                                                                               |                                                                                                                                                                                                                |

|                                                                                                                                                  |                                                                                                                                      |                                                                                                                                       |
|--------------------------------------------------------------------------------------------------------------------------------------------------|--------------------------------------------------------------------------------------------------------------------------------------|---------------------------------------------------------------------------------------------------------------------------------------|
| Deficiencies and actions related to administration and documentation                                                                             | Non-adherence to local documentation policies<br>Inadequate, missing, wrong, or delayed documentation in patient records             | Patient record reviews for quality improvement<br>New guidelines or routines for the documentation process                            |
| <b>External communication</b>                                                                                                                    |                                                                                                                                      |                                                                                                                                       |
| Deficiencies and actions related to cooperation, communication, and collaboration with actors outside the unit/clinic of the healthcare provider | Absence of or inadequacies in information provided at discharge from hospital to other care providers involved in the patient's care | New meeting points for cooperation between different healthcare providers, consultation meetings                                      |
| <b>Internal communication</b>                                                                                                                    |                                                                                                                                      |                                                                                                                                       |
| Deficiencies and actions related to cooperation, communication, and interaction between staff within the unit, and between staff and patient     | Lack of sharing of important information regarding care between staff, or between staff and patient                                  | New routines for intern communication/reports, written or oral                                                                        |
| <b>Education and competence</b>                                                                                                                  |                                                                                                                                      |                                                                                                                                       |
| <b>Education and competence, not specified</b>                                                                                                   |                                                                                                                                      |                                                                                                                                       |
| Deficiencies and actions related to education and competence, excluding those related to suicide risk assessments                                | Inadequacies in competence or experience of staff<br>Inadequate supervision or introduction of staff                                 | Case report discussions at staff meetings, lectures<br>Reminding staff of existing guidelines                                         |
| <b>Education and competence in suicide risk assessment</b>                                                                                       |                                                                                                                                      |                                                                                                                                       |
| Deficiencies and actions related to education and competence in suicide risk assessment                                                          | Inadequate knowledge or experience of staff to conduct a sufficient suicide risk assessment                                          | Lectures and training in suicide risk assessment<br>Reminding staff about existing policies and guidelines of suicide risk assessment |
| <b>Technics and equipment</b>                                                                                                                    |                                                                                                                                      |                                                                                                                                       |
| Deficiencies and actions regarding technics and equipment                                                                                        | Ligature points (hooks, doors) in hospital<br>Shortcomings in information technology systems                                         | Removal of ligature points (hooks, doors) in hospital<br>Changes in information technology systems                                    |
| <b>Organization and management</b>                                                                                                               |                                                                                                                                      |                                                                                                                                       |
| <b>Human resources</b>                                                                                                                           |                                                                                                                                      |                                                                                                                                       |
| Deficiencies and actions involving staffing, care availability, and psychological working environment                                            | Lack of staff<br>Lack of staff continuity<br>Temporary (rented) doctors<br>Heavy workload                                            | Recruiting new staff<br>Changes in working schedule<br>Changes in job assignments and work distribution between staff                 |
| <b>Number of beds in hospital</b>                                                                                                                |                                                                                                                                      |                                                                                                                                       |
| Deficiencies and actions related to available beds in hospital                                                                                   | Patient not admitted to inpatient care or discharged because no beds were available                                                  | Efforts to expand the number of beds in hospital                                                                                      |
| <b>Organization/management</b>                                                                                                                   |                                                                                                                                      |                                                                                                                                       |
| Deficiencies and actions related to leadership, organizational structure of healthcare, and physical working environment                         | Organizational structures impairing healthcare<br>Shortcomings in leaders' execution of responsibility                               | Organizational reconstructions<br>Rebuilding of premises                                                                              |

|                                                                                                                                       |                                                                                                                                                    |                                                                                                                                                            |
|---------------------------------------------------------------------------------------------------------------------------------------|----------------------------------------------------------------------------------------------------------------------------------------------------|------------------------------------------------------------------------------------------------------------------------------------------------------------|
|                                                                                                                                       | Inadequate premises                                                                                                                                |                                                                                                                                                            |
| <b>Policies and procedures</b>                                                                                                        |                                                                                                                                                    |                                                                                                                                                            |
| <b>Care plan and crisis plan</b>                                                                                                      |                                                                                                                                                    |                                                                                                                                                            |
| Deficiencies and actions related to care plan or crisis plan                                                                          | Inadequate or lack of care plan/ crisis plan                                                                                                       | New routines for making care plan /crisis plan or follow up                                                                                                |
| <b>Diagnosis</b>                                                                                                                      |                                                                                                                                                    |                                                                                                                                                            |
| Deficiencies and actions related to the diagnostic process                                                                            | Delayed, missed, wrong, or inadequate diagnosis                                                                                                    | New guidelines or routines for the diagnostic process                                                                                                      |
| <b>Suicide risk assessment</b>                                                                                                        |                                                                                                                                                    |                                                                                                                                                            |
| Deficiencies and actions related to the process of suicide risk assessment                                                            | Non-adherence to local policy or guidelines for suicide risk assessment<br>Inadequate risk assessment                                              | New guidelines or routines for suicide risk assessments                                                                                                    |
| <b>Treatment</b>                                                                                                                      |                                                                                                                                                    |                                                                                                                                                            |
| Deficiencies and actions related to treatment of the patient                                                                          | Complications or side-effects of medication/treatment<br>Delayed, inadequate, or wrong medication/treatment<br>Doctors' prescribing                | New guidelines, recommendations, or routines for treatment strategies for specific disorders<br>New recommendations for prescription of psychotropic drugs |
| <b>Work process</b>                                                                                                                   |                                                                                                                                                    |                                                                                                                                                            |
| Deficiencies and actions related to the daily working process of staff and the process of reporting and taking care of adverse events | Non-adherence to local policies, routines, or checklists regarding working process of staff<br>Inadequacies in supervision of patients in hospital | New guidelines or routines regarding working process for staff<br>New routines in the process of reporting and taking care of adverse events               |
| <b>Others</b>                                                                                                                         |                                                                                                                                                    |                                                                                                                                                            |
| Deficiencies and actions not specified elsewhere                                                                                      |                                                                                                                                                    |                                                                                                                                                            |

### Organizational levels

A classification of the organizational levels of deficiencies and actions was conducted to better understand where in the organizational system the identified deficiencies and actions were situated. The deficiencies and actions were coded according to a micro-meso-macro-perspective.<sup>21</sup> Microsystems were defined as the basic building blocks of all healthcare systems formed around the patient and family, such as the inpatient or outpatient care unit. The mesosystem encompassed interactions between different microsystem units, such as cooperation between clinics or healthcare providers. The macrosystem involved the whole system of healthcare, such as legislation, political prioritizations, and national policies on healthcare. The highest organizational level for each deficiency, immediate action, and non-immediate action for each case was coded.

### Supervisory authority

The decisions of the supervisory authority were coded as follows: "immediate approval," "request for one or more additions," or "inspection."

### Statistical analyses



Summary statistics were calculated for deficiencies, immediate actions, non-immediate actions, and decisions of the supervisory authority. Frequencies for each category and organizational hierarchical level in deficiencies, immediate actions, and non-immediate actions were analyzed per individual and aggregated.

Chi-square tests of independence were used to compare the number of deficiencies and non-immediate actions in the same category. We considered a two-sided p-value of  $<.005$  to be statistically significant. Fisher's exact test was used in cases where 20% of the analyzed groups had an expected count of less than 5. The statistical analyses were performed using IBM SPSS Statistics 24.

### Ethical review

According to the Swedish *Act Concerning the Ethical Review of Research Involving Humans* (2003:460) and an advisory opinion from the Regional Ethical Review Board (no. 2017/234), this study did not require ethical review as it did not include human participants.

## RESULTS

### Cases

In total, 1179 suicides were registered in Sweden in 2015.<sup>8</sup> The supervisory authority received 473 reports. In 35 cases, the same suicide was reported by different healthcare providers, regarding different parts and perspectives of the care process, and for one case, the same suicide was reported by three providers, resulting in 436 unique suicide cases. Characteristics of the cases and healthcare received in the last three months before suicide are presented in *Table 2*.

**Table 2. Characteristics of cases and care received during the last three months before suicide (including all areas of healthcare)**

| Characteristic                                                                             |                                  | n (%)    |
|--------------------------------------------------------------------------------------------|----------------------------------|----------|
| <b>Gender</b>                                                                              | Men                              | 283 (65) |
|                                                                                            | Women                            | 152 (35) |
| <b>Age, years</b>                                                                          | Median 49, range 13-93           |          |
| <b>Healthcare provider last in contact with the patient</b>                                | Psychiatric care                 | 290 (67) |
|                                                                                            | Primary care                     | 94 (22)  |
|                                                                                            | Somatic care                     | 33 (8)   |
|                                                                                            | Other                            | 18 (4)   |
| <b>Time until death after last contact with healthcare system, days</b>                    | Median 4, range 0-88             |          |
| <b>Number of contacts with outpatient healthcare services during the last three months</b> | 1                                | 38 (9)   |
|                                                                                            | 2-4                              | 105 (24) |
|                                                                                            | >5                               | 216 (50) |
| <b>Inpatient care</b>                                                                      | During the last three months     | 146 (33) |
|                                                                                            | Inpatient at time of death       | 36 (8)   |
| <b>Major psychiatric diagnosis documented in patient record</b>                            | Total (F00-F98)                  | 370 (85) |
|                                                                                            | Affective disorder (F30)         | 153 (35) |
|                                                                                            | Anxiety disorder (F40)           | 77 (18)  |
|                                                                                            | Substance abuse (F10)            | 51 (12)  |
|                                                                                            | Psychosis (F20)                  | 36 (8)   |
|                                                                                            | Attention deficit disorder (F90) | 20 (5)   |
|                                                                                            | Personality disorder (F60)       | 13 (3)   |
|                                                                                            | Autism spectrum (F84)            | 13 (3)   |
|                                                                                            | Other                            | 7 (2)    |

|                                                                                              |                           |          |
|----------------------------------------------------------------------------------------------|---------------------------|----------|
| <b>Prescribed psychotropic drugs at time of death</b>                                        | Total                     | 349 (80) |
|                                                                                              | Sleeping pills            | 274 (63) |
|                                                                                              | Antidepressants           | 265 (61) |
|                                                                                              | Anxiolytics               | 216 (50) |
|                                                                                              | Antipsychotics, oral      | 97 (22)  |
|                                                                                              | Mood stabilizers          | 47 (11)  |
|                                                                                              | Antipsychotics, injection | 18 (4)   |
| <b>Suicide risk assessment documented in patient record in the three months before death</b> | Absent                    | 108 (25) |
|                                                                                              | Low/nonexistent           | 171 (39) |
|                                                                                              | Elevated, not acute       | 116 (27) |
|                                                                                              | High/acute                | 41 (9)   |

### Deficiencies in healthcare before suicide

In 55% (n=240) of suicide cases, the healthcare provider identified deficiencies in the healthcare that were considered to have contributed to the suicide. Among all cases, a total of 952 deficiencies were identified. The number of deficiencies per case ranged from 1 to 21, with a median of 3.

The most frequent deficiencies were in “treatment” and “suicide risk assessment”. Examples were inadequate or delayed pharmacological treatment, non-adherence to existing guidelines, inadequacies in doctors’ prescribing, a misleading suicide risk assessment, and non-adherence to local guidelines for suicide risk assessment. Deficiencies in “external communication” were the third most frequent. Examples were shortcomings in communication between a somatic and psychiatric clinic and a lack of important information being handed over from one healthcare provider to another. For further details, see *Tables 3 and 4*. In 7 cases, identical deficiencies for the same case were reported by different providers, categorized as “external communication”, “treatment”, “suicide risk assessment” and “care plan.”

**Table 3. Proportions of cases with deficiencies, immediate actions, and non-immediate actions reported in the investigations of healthcare made after suicide.**

| Category                                            | Cases with deficiencies n (%) | Cases with immediate actions n (%) | Cases with non-immediate actions n (%) |
|-----------------------------------------------------|-------------------------------|------------------------------------|----------------------------------------|
| <b>All cases</b>                                    | 240 (55)                      | 26 (6)                             | 347 (80)                               |
| <b>Communication and information</b>                |                               |                                    |                                        |
| Communication with peers and family                 | 51 (12)                       | 2 (0.5)                            | 51 (12)                                |
| Documentation                                       | 65 (15)                       | 1 (0.2)                            | 71 (16)                                |
| External communication                              | 74 (17)                       | 2 (0.5)                            | 80 (18)                                |
| Internal communication                              | 61 (14)                       | 0 (0)                              | 55 (13)                                |
| <b>Education and competence</b>                     |                               |                                    |                                        |
| Education and competence not specified              | 54 (11)                       | 1 (0.2)                            | 166 (38) <sup>a</sup>                  |
| Education and competence in suicide risk assessment | 9 (2)                         | 6 (1)                              | 136 (31) <sup>a</sup>                  |
| <b>Organization and management</b>                  |                               |                                    |                                        |
| Human resources                                     | 60 (14)                       | 6 (1)                              | 67 (15)                                |
| Number of beds                                      | 9 (2)                         | 0 (0)                              | 4 (1)                                  |
| Organization/management                             | 13 (3)                        | 2 (0.5)                            | 22 (5) <sup>b</sup>                    |
| <b>Policies and procedures</b>                      |                               |                                    |                                        |

|                               |         |         |                       |
|-------------------------------|---------|---------|-----------------------|
| Treatment                     | 84 (19) | 2 (0.5) | 57 (13) <sup>c</sup>  |
| Suicide risk assessment       | 86 (20) | 6 (1)   | 94 (22)               |
| Work process                  | 50 (11) | 6 (1)   | 119 (27) <sup>a</sup> |
| Diagnostics                   | 54 (12) | 2 (0.5) | 28 (6) <sup>c</sup>   |
| Care plan and crisis plan     | 46 (11) | 0 (0)   | 46 (11)               |
| <b>Technics and equipment</b> | 13 (3)  | 6 (1)   | 22 (5) <sup>b</sup>   |
| <b>Other</b>                  | 11 (3)  | 1 (0.2) | 8 (2)                 |

<sup>a</sup> significantly more cases with reported non-immediate actions compared with deficiencies,  $p < 0.0001$

<sup>b</sup> significantly more cases with reported non-immediate actions compared with deficiencies,  $p < 0.002$

<sup>c</sup> significantly more cases with reported deficiencies compared with non-immediate actions,  $p < 0.0001$

**Table 4. Total number of deficiencies, immediate actions, and non-immediate actions reported in the investigations of healthcare made after suicide.**

| Category                                            | Total number of deficiencies, n | Total number of immediate actions, n | Total number of non-immediate actions, n |
|-----------------------------------------------------|---------------------------------|--------------------------------------|------------------------------------------|
| Total number reported in all investigations         | 952                             | 45                                   | 1330                                     |
| <b>Communication and information</b>                |                                 |                                      |                                          |
| Communication with peers and family                 | 61                              | 2                                    | 56                                       |
| Documentation                                       | 87                              | 1                                    | 84                                       |
| External communication                              | 103                             | 2                                    | 109                                      |
| Internal communication                              | 77                              | 0                                    | 59                                       |
| <b>Education and competence</b>                     |                                 |                                      |                                          |
| Education and competence not specified              | 73                              | 1                                    | 261                                      |
| Education and competence in suicide risk assessment | 9                               | 6                                    | 168                                      |
| <b>Organization and management</b>                  |                                 |                                      |                                          |
| Human resources                                     | 81                              | 7                                    | 86                                       |
| Number of beds                                      | 10                              | 0                                    | 4                                        |
| Organization/management                             | 14                              | 3                                    | 27                                       |
| <b>Policies and procedures</b>                      |                                 |                                      |                                          |
| Treatment                                           | 115                             | 2                                    | 72                                       |
| Suicide risk assessment                             | 101                             | 6                                    | 112                                      |
| Work process                                        | 74                              | 6                                    | 161                                      |
| Diagnostics                                         | 70                              | 2                                    | 33                                       |
| Care plan and crisis plan                           | 50                              | 0                                    | 57                                       |
| <b>Technics and equipment</b>                       |                                 |                                      |                                          |
| Technics and equipment                              | 16                              | 6                                    | 33                                       |
| <b>Other</b>                                        |                                 |                                      |                                          |
| Other                                               | 11                              | 1                                    | 8                                        |

Note: Each case can be represented by several factors in the same category. Total numbers of reported factors in the investigations (n) are given in the table.

All reported deficiencies were at the micro level in 65% (n=157) of cases (*Table 5*). An example of a deficiency at the micro level was inadequacies in doctors' prescribing or in suicide risk assessment. The remaining 35% (n=83) had at least one deficiency at the meso level, such as shortcomings in cooperation between a psychiatric clinic and somatic clinic or inadequacies in communication between hospital and municipality. No deficiencies were considered to be at the macro level.

**Table 5. Distribution of the highest organizational hierarchy level of deficiencies, immediate actions, and non-immediate actions in the cases.**

| Organizational level | Deficiencies | Immediate actions | Non-immediate actions |
|----------------------|--------------|-------------------|-----------------------|
| Micro                | 157 (65)     | 25 (96)           | 225 (65)              |
| Meso                 | 83 (35)      | 1 (4)             | 120 (35)              |
| Macro                | 0 (0)        | 0 (0)             | 1 (0)                 |

Note: Only the highest level in every case is noted. Number and percentage of cases at each level are given in the table, n (%).

### Routines

Deficiencies in routines were reported in 20% (n=96) of all cases. These often reflected non-adherence to existing routines. Missing or defective routines were reported in 11% (n=49) of cases. Deficiencies in routines could occur in any category.

### Patient-related factors

In 31% (n=135) of cases, patient-related factors were reported to have contributed to the suicide. Examples were changes in the patient's private relationships or life conditions, or circumstances the provider considered to be outside the influence of healthcare.

### Immediately performed actions

Immediately performed actions were reported in 6% (n=26) of cases. In these, 45 immediate actions were described. The number of immediate actions per case ranged from 1 to 7, with a median of 1. The most frequent immediate actions taken were categorized as "human resources," usually recruitment of physicians (*Tables 3 and 4*). In one case, there was an action at the meso level; the remainders were all at the micro level (*Table 5*).

### Non-immediate actions

Non-immediate actions aiming to prevent new suicides were taken or proposed in 80% (n=347) of all cases. In these, a total of 1330 interventions were described. The number of actions per case ranged from 1 to 20, with a median of 3.

The most frequent non-immediate actions were in the category of "education and competence not specified." Examples were case report discussions at staff meetings, lectures about affective disorders, and reminding staff about existing local guidelines. The second most frequently reported non-immediate action category was "education and competence in suicide risk assessment." Examples were lectures for staff about suicide risk assessment and reminding staff about existing guidelines for suicide risk assessment. Together, non-immediate actions in either of these two categories were described in 52% (n=227) of all cases, corresponding to 32% of all reported non-immediate actions.

1  
2  
3 The third most frequent non-immediate action category was changes in “work process.” Examples  
4 were new checklists and changes in the intern system of reporting adverse events. For further details,  
5 see *Tables 3 and 4*. Identical actions regarding the same case were reported by different providers in  
6 12 cases and were in the categories of “external communication,” “education and competence not  
7 specified,” “suicide risk assessment,” “care plan,” “work process” and “education and competence in  
8 suicide risk assessment.”  
9

10  
11 The organizational levels of the non-immediate actions were equal to those of the deficiencies; in 65%  
12 (n=225) of the cases, all actions were at the micro level and in 35% (n=120) there was at least one  
13 action at the meso level (*Table 5*). Examples of actions at the micro level were case discussions at staff  
14 meetings, lectures, and new checklists. Examples of actions at the meso level were changed  
15 procedures for communication or cooperation between different healthcare providers. Only one  
16 proposal was at the macro level, and this involved the possibility of the prescribing doctor checking  
17 what medications a patient received from pharmacies throughout the country.  
18  
19

### 20 21 Routines

22 Changes in routines were proposed in 35% (n=152) of all cases, and these actions could be in any  
23 category.  
24

### 25 26 **Decisions of the supervisory authority**

27  
28 In 65% (n=284) of cases, the supervisory authority approved the report from the healthcare provider  
29 without further requirements. In 29% (n=126), the supervisory authority called for one or more  
30 additions to the investigation before approval. In 6% (n=25), an inspection took place at the healthcare  
31 provider before the decision, and in these cases the supervisory authority usually called for additional  
32 actions before their decision. Of the 36 cases with more than one investigation, the decisions of the  
33 authority differed in 16 cases.  
34  
35

## 36 37 **DISCUSSION**

38 This study describes the aggregate results of healthcare provider investigations made after suicides in  
39 Sweden in 2015. In more than half of the studied cases, there were deficiencies in the healthcare  
40 provided before suicide that were considered to have contributed to the death. The majority of the  
41 deficiencies were at the micro organizational level, and no deficiency was found at the macro level.  
42 The most common deficiencies involved care delivered in the immediate interface between patient and  
43 staff, which were relatively easy for the investigators to identify. Actions to deal with the deficiencies  
44 were substantially more frequent than the number of described deficiencies and were dominated by  
45 educational actions. The majority of the actions were at the micro level, and only one proposed action  
46 was at the macro level.  
47  
48

49  
50 The most frequently reported deficiencies were related to “treatment.” Four out of five patients in this  
51 study were prescribed psychotropic drugs, most commonly sleeping pills and antidepressants.  
52 Pharmacological treatment of psychiatric disorders is regarded as a central and evidence-based  
53 component of the prevention of suicide.<sup>7 22</sup> To deliver the right treatment for the patient, correct  
54 diagnoses are essential: diagnostic errors are known to be common causes of adverse events in all  
55 areas of healthcare.<sup>23 24</sup> A majority of the patients in this study had at least one documented psychiatric  
56 diagnosis, although less than half had a diagnosis of depression. The deficiencies in “diagnosis”  
57 category were lower than would be expected, given the known outcome of suicide, the fact that all  
58 cases had contact with healthcare shortly before death, and the fact that a vast majority of suicide  
59  
60

1  
2  
3 deaths involve individuals who meet the diagnostic criteria for depression at time of death.<sup>5</sup> Many  
4 investigations were performed without the participation of a physician, which could help explain the  
5 low number of reported diagnostic errors.  
6

7 Admission to inpatient care is a common choice of treatment for those at risk of suicide. One third of  
8 the patients in this study were admitted to the hospital in the three months before their death; however,  
9 only 8% of the suicide deaths involved inpatients, which is notably lower than the 24% found in a  
10 review of suicides in Sweden in 2007.<sup>9</sup> This decrease could be a result of safer inpatient care;  
11 however, it could also reflect a shift of suicides from inpatient care to the post-discharge period,  
12 mirroring the reduction in the number of beds in psychiatric care during the last few decades.<sup>25</sup>  
13 However, investigators in the present study did not reach this conclusion, as the number of hospital  
14 beds was reported as contributing to suicides in only 2% of cases. At the same time, it is not clear if  
15 this low frequency resulted because investigators considered this to be an issue outside their mandate.  
16  
17  
18

19 Deficiencies in “suicide risk assessment” were frequently reported, as exemplified by inadequate  
20 performance of risk assessment or insufficient supervision of patients assessed to be at high risk for  
21 suicide at psychiatric inpatient units. All cases in this study were in contact with healthcare services  
22 during the three months before their suicide, and 90% were in contact more than once. Documentation  
23 of suicide risk in patients’ records during the last three months before suicide was absent in 25% of  
24 cases and regarded as low/nonexistent in 39%. Suicide is usually the final outcome of a process over  
25 time and involves the interaction of several factors. As suicide intentions also fluctuate rapidly,  
26 assessments must be repeated to catch suicidal crises.<sup>6</sup> The small number of cases in this study where  
27 suicide risk was assessed as high might reflect difficulties in assessments. However, it could also  
28 indicate success of healthcare in cases when suicide risk was assessed as high and then followed by  
29 preventive actions. Further research is needed to confirm this hypothesis.  
30  
31  
32

33 Substantially more actions to prevent new suicides were reported compared to the number of identified  
34 deficiencies, possibly reflecting insights into the weaknesses of the healthcare system that confer risk  
35 to patient safety. The proposed actions centered on educational interventions: these actions were  
36 proposed for half of cases and corresponded to one third of all reported actions. In comparison,  
37 deficiencies in “education and competence” were reported in only 10% of cases, indicated that  
38 providers aimed to solve deficiencies in different categories with educational actions. Most of the  
39 proposed educational actions represented a single case discussion or reminder of a routine in staff  
40 meetings, suggesting that the deficiencies were being simplified and quick fixes were being applied.  
41 Evidence that educational interventions reduce suicide rates relies on studies of extensive education  
42 programs.<sup>26-30</sup> In order to reach successful implementation and sustainable behavior change,  
43 considerable work - including long-term multi-faceted interventions - is usually needed. Macrae  
44 emphasizes the importance of active reflection, mindful participation, and emotional engagement.<sup>31 32</sup>  
45 If this kind of reflection is not part of how healthcare providers promote learning, the large amount of  
46 single educational actions can create a false sense of security without making the organization safer.  
47 Strong leadership with visible engagement in patient safety at all levels is of high importance in  
48 shaping and maintaining safe structures in organizations.<sup>32-36</sup> Very few deficiencies regarding  
49 management were reported in this study, probably reflecting the investigators’ lack of understanding  
50 of this issue rather than an absence of management shortcomings.  
51  
52  
53  
54  
55

56 Even though missing or defective routines seldom were reported as contributing to suicides, new or  
57 changed routines were proposed to prevent new suicides in one third of the investigations, often in the  
58 category of “work process.” This focus on routines in patient harm investigations has been shown  
59 before.<sup>9 35 37</sup> Well-functioning work processes and adherence to routines are indisputably of high  
60

1  
2  
3 importance for ensuring safe healthcare. However, the large number of changes without corresponding  
4 shortcomings shown in this study might result in insecurity, rather than safety, among staff. This  
5 suggests that providers oversimplify the challenges of patient safety at the frontlines of healthcare.  
6

7  
8 Immediate action was taken in only a few cases, which probably reflects the absence of obvious  
9 deficiencies possible to be fixed. Compared to non-immediate actions, a larger share of immediate  
10 actions concerned “technics and equipment,” usually the removal of ligature points such as hooks and  
11 doors.  
12

13  
14 A majority of identified deficiencies and actions were at the organizational micro level – they were  
15 usually within the care unit where the patient had their last contact with healthcare services. These  
16 findings were similar to those of a prior Swedish study.<sup>18</sup> The results probably reflect the  
17 investigators’ knowledge and understanding of suicide and what they consider can be fixed more than  
18 the actual circumstances. The real purpose of investigations of healthcare after adverse events should  
19 be to reveal gaps and inadequacies in the healthcare system and to find effective and meaningful  
20 actions leading to sustainable improvement of healthcare.<sup>38</sup> To succeed in this, we need to develop  
21 methods appropriate to current healthcare services and to improve the ability of healthcare  
22 organizations to learn from and recall incidents and investigation outcomes.<sup>10 31 32</sup> Past studies have  
23 shown that the results and conclusions of investigations are rarely passed down to the organization and  
24 that there is an absence of formalized organizational memory, even though many patient safety  
25 activities that arise from the investigations after incidents are based on such memory-making  
26 activities.<sup>18 39</sup>  
27  
28

29  
30 Vincent suggests the use of a “safety analysis of the patient journey” to identify the series of events  
31 and combinations of errors and system vulnerabilities that in combination and gradually unfold over  
32 time.<sup>32</sup> Analyses over a longer period of time would enable identification of successful recovery from  
33 suicidal crises, which is necessary knowledge to progress in work on suicide prevention. This  
34 approach also requires investigators to view care through the eyes of patients, understand the patient’s  
35 journey in the care system, and to grasp the reality of the complex healthcare system the patient and  
36 next of kin have to navigate. Attention to interactions between different levels of the organization is  
37 also needed. What happens at the micro level, such as in personal meetings with patients, reflects  
38 decisions and management at the top of the healthcare organization; as well what happens at the micro  
39 level influences top-level decisions.<sup>40</sup> These reflections on time, patient perspectives, and  
40 organizations were generally nonexistent in the investigations in this study but appear necessary to  
41 achieve progress in the care of suicidal patients.  
42  
43  
44

45  
46 This study illustrate how suicide as a possible patient harm is investigated in a nation where a RCA-  
47 inspired method is the recommended method, and what kind of learning and change in the health care  
48 systems that are possible with that approach. The result implies that sharper methods of investigation  
49 are needed to achieve progress in patient safety.  
50  
51  
52

### 53 **Limitations and strengths**

54  
55 All data were based on the healthcare providers’ reports of suicide to the supervisory authority. The  
56 contents in these reports are regulated by law; however, there still may have been shortcomings and  
57 inadequacies not pointed out and that the authority did not observe. The investigations were performed  
58 in different contexts by different persons with a large spectrum of disparities in experiences resulting  
59 in variegated quality. The investigations were performed after suicides, which often upset and strongly  
60

1  
2  
3 affect involved staff, and an awareness of external supervision might have biased the outcomes.  
4 Furthermore, there is no national taxonomy for categorization of deficiencies and actions; a coding  
5 scheme was therefore created and used in this study. The category of “others” was used only in a few  
6 cases, suggesting the categories in the coding scheme covered most of the reported deficiencies and  
7 actions.  
8  
9

10 The strengths of this study are that the data collection and categorization were conducted by only one  
11 researcher, an experienced psychiatrist, to achieve consistency, and that the data were population-  
12 based. This study was performed almost a decade after the obligation to report suicides was  
13 implemented and most providers and investigators would have been familiar with the procedure.  
14 Therefore, the cases in the study are expected to match the actual numbers to a good extent and the  
15 investigations are expected to be representative for suicides committed by patients in contact with  
16 healthcare within four weeks before death.  
17

## 18 **Conclusions**

19  
20  
21 Many of the individuals who died by suicide were in contact with healthcare services shortly before  
22 death, and deficiencies in healthcare considered to contribute to these deaths were reported for more  
23 than half of these patients. The majority of reported deficiencies and actions were at the organizational  
24 micro level and the most common deficiencies related to care delivered in the immediate interface  
25 between patient and involved staff, which was easy for the investigators to identify. Actions proposed  
26 to prevent new suicides were centered on single educational interventions without distinctive  
27 sustainable effects in the organizations and usually did not correspond with the identified deficiencies.  
28  
29

30  
31 Generally, the investigations lacked the perspectives of the patients and an analysis of the suicide  
32 process over time in connection with the complexity of healthcare organizations. Future research  
33 should examine if application of a framework based on knowledge of the suicide process, strategies of  
34 suicide prevention, and patient safety would enable more sophisticated investigations facilitating  
35 progress in work on the prevention of suicide.  
36  
37  
38  
39

## 40 **REFERENCES**

- 41  
42 1 WHO. Suicide data. 2018.  
43 [http://www.who.int/mental\\_health/prevention/suicide/suicideprevent/en/](http://www.who.int/mental_health/prevention/suicide/suicideprevent/en/) (accessed 17 October  
44 2018)
- 45 2 Beskow J. The prevention of suicide while in psychiatric care. *Acta Psychiatr Scand Suppl*  
46 1987;336:66-75.
- 47 3 Luoma JB, Martin CE, Pearson JL. Contact with mental health and primary care providers  
48 before suicide: a review of the evidence. *Am J Psychiatry* 2002;159:909-16. doi:  
49 10.1176/appi.ajp.159.6.909
- 50 4 Qin P, Nordentoft M. Suicide risk in relation to psychiatric hospitalization: evidence based on  
51 longitudinal registers. *Arch Gen Psychiatry* 2005;62:427-32. doi: 10.1001/archpsyc.62.4.427
- 52 5 Cavanagh JT, Carson AJ, Sharpe M, et al. Psychological autopsy studies of suicide: a  
53 systematic review. *Psychol Med* 2003;33:395-405. doi:10.1017/s0033291702006943
- 54 6 Wasserman D, Rihmer Z, Rujescu D, et al. The European Psychiatric Association (EPA)  
55 guidance on suicide treatment and prevention. *Eur Psychiatry* 2012;27:129-41. doi:  
56 10.1016/j.eurpsy.2011.06.003
- 57 7 Zalsman G, Hawton K, Wasserman D, et al. Suicide prevention strategies revisited: 10-year  
58 systematic review. *Lancet Psychiatry* 2016;3:646-59. doi: 10.1016/s2215-0366(16)30030-x  
59  
60



- 1  
2  
3 8 Socialstyrelsen. 2018. <https://www.socialstyrelsen.se/register/dodsorsaksregistret> (accessed 17  
4 October 2018)
- 5 9 Socialstyrelsen. Själv mord 2006-2008 anmälda enligt Lex Maria. Stockholm, 2007.
- 6 10 Vincent C, Amalberti R. Safety in healthcare is a moving target. *BMJ Qual Saf* 2015;24:539-  
7 40. doi: 10.1136/bmjqs-2015-004403
- 8 11 Stanhope N, Crowley-Murphy M, Vincent C, et al. An evaluation of adverse incident  
9 reporting. *J Eval Clin Pract* 1999;5:5-12. doi: 10.1046/j.1365-2753.1999.00146.x
- 10 12 Reason J. Human error: models and management. *BMJ* 2000;320:768-70. doi:  
11 10.1136/bmj.320.7237.768
- 12 13 Braithwaite J, Wears RL, Hollnagel E. Resilient health care: turning patient safety on its head.  
13 *Int J Qual Health Care* 2015;27:418-20. doi: 10.1093/intqhc/mzv063
- 14 14 Macrae C. The problem with incident reporting. *BMJ Qual Saf* 2016;25:71-5. doi:  
15 10.1136/bmjqs-2015-004732
- 16 15 Mitchell I, Schuster A, Smith K, et al. Patient safety incident reporting: a qualitative study of  
17 thoughts and perceptions of experts 15 years after 'To Err is Human'. *BMJ Qual Saf*  
18 2016;25:92-9. doi: 10.1136/bmjqs-2015-004405
- 19 16 Kellogg KM, Hettinger Z, Shah M, et al. Our current approach to root cause analysis: is it  
20 contributing to our failure to improve patient safety? *BMJ Qual Saf* 2017;26:381-87. doi:  
21 10.1136/bmjqs-2016-005991
- 22 17 Wu AW, Lipshutz AK, Pronovost PJ. Effectiveness and efficiency of root cause analysis in  
23 medicine. *JAMA* 2008;299:685-7. doi: 10.1001/jama.299.6.68
- 24 18 Wrigstad J, Begström J, Gustafsson P. Mind the gap between recommendation and  
25 implementation—principles and lessons in the aftermath of incident investigations: a semi-  
26 quantitative and qualitative study of factors leading to the successful implementation of  
27 recommendations. *BMJ Open* 2014;4:e005326. doi: 10.1136/bmjopen-2014-005326
- 28 19 The Swedish Patient Safety Act (SFS 2010:659). [https://www.riksdagen.se/sv/dokument-  
29 lagar/dokument/svensk-forfattningssamling/patientsakerhetslag-2010659\\_sfs-2010-659.](https://www.riksdagen.se/sv/dokument-lagar/dokument/svensk-forfattningssamling/patientsakerhetslag-2010659_sfs-2010-659)  
30 (accessed 2 February 2019)
- 31 20 Sveriges Kommuner och Landsting. Riskanalys och händelseanalys Vol 3. Stockholm:  
32 Sveriges Kommuner och Landsting; 2015.
- 33 21 Nelson EC, Batalden PB, Godfrey MM. Quality by design: a clinical microsystems approach.  
34 San Fransisco: Jossey-Bass; 2007.
- 35 22 Mann JJ, Apter A, Bertolote J, et al. Suicide prevention strategies: a systematic review. *JAMA*  
36 2005;294:2064-74. doi: 10.1001/jama.294.16.2064
- 37 23 Panesar SS, deSilva D, Carson-Stevens A, et al. How safe is primary care? A systematic  
38 review. *BMJ Qual Saf* 2016;25:544-53. doi: 10.1136/bmjqs-2015-004178
- 39 24 Schiff GD, Kim S, Abrams R, et al. Diagnosing diagnosis errors: lessons from a multi-  
40 institutional collaborative project. In: Henriksen K, Battles JB, Marks ES, et al., eds. *Advances*  
41 *in Patient Safety: From Research to Implementation (Volume 2: Concepts and Methodology)*.  
42 Rockville MD: Agency for Healthcare Reserach and Quality; 2005.
- 43 25 Sveriges Kommuner och Landsting. SKL:s verksamhetstabeller 2007-2016. Stockholm:  
44 Sveries Kommuner och Landsting; 2016.  
45 [https://skl.se/ekonomijuridikstatistik/statistik/ekonomiochverksamhetsstatistik/landstingekon-  
46 omiochverksamhet.1342.html](https://skl.se/ekonomijuridikstatistik/statistik/ekonomiochverksamhetsstatistik/landstingekonomiochverksamhet.1342.html). (accessed 18 March 2019)
- 47 26 Rihmer Z, Belsö N, Kalmar S. Antidepressants and suicide prevention in Hungary. *Acta*  
48 *Psychiatr Scand* 2001;103:238-39
- 49 27 Rutz W. Preventing suicide and premature death by education and treatment. *J Affect Disord*  
50 2001;62:123-29. doi: 10.1016/s0165-0327(00)00356-6
- 51 28 Rutz W, von Knorring L, Wahlinder J. Frequency of suicide on Gotland after systematic  
52 postgraduate education of general practitioners. *Acta Psychiatr Scand* 1989;80:151-54. doi:  
53 10.1111/j.1600-0447.1989.tb01318.x
- 54 29 Roskar S, Podlesek A, Zorko M, et al. Effects of training program on recognition and  
55 management of depression and suicide risk evaluation for Slovenian primary-care physicians:  
56 follow-up study. *Croat Med J* 2010;51:237-42. doi: 10.3325/cmj.2010.51.237  
57  
58  
59  
60

- 1  
2  
3 30 Szanto K, Kalmar S, Hendin H, et al. A suicide prevention program in a region with a very  
4 high suicide rate. *Arch Gen Psychiatry* 2007;64:914-20. doi: 10.1001/archpsyc.64.8.914  
5 31 Macrae C. Remembering to learn: the overlooked role of remembrance in safety improvement.  
6 *BMJ Qual Saf* 2017;26:678-82. doi: 10.1136/bmjqs-2016-005547  
7 32 Vincent C, Carthey J, Macrae C, et al. Safety analysis over time: seven major changes to  
8 adverse event investigation. *Implement Sci* 2017;12:151. doi: 10.1186/s13012-017-0695-4  
9 33 Jayaram G. Inpatient suicide prevention: promoting a culture and system of safety over 30  
10 years of practice. *J Psychiatr Pract* 2014;20:392-404. doi:  
11 10.1097/01.pra.0000453369.71092.69  
12 34 Mills PD, Neily J, Kinney LM, et al. Effective interventions and implementation strategies to  
13 reduce adverse drug events in the Veterans Affairs (VA) system. *Qual Saf Health Care*  
14 2008;17:37-46.  
15 35 Mills PD, Neily J, Luan D, et al. Actions and implementation strategies to reduce suicidal  
16 events in the Veterans Health Administration. *Jt Comm J Qual Patient Saf* 2006;32:130-41.  
17 doi: 10.1136/qshc.2006.021816  
18 36 Weick KE, Sutcliffe KM. Managing the unexpected: Resilient performance in an age of  
19 uncertainty. New York: John Wiley & Sons; 2011.  
20 37 Palmér S. Blev det någon verkstad? Bidrar lex Maria och lex Sarah till säkrare vård och  
21 omsorg? Stockholm; 2016. [https://www.ivo.se/publicerat-material/rapporter/blev-det-nagon-](https://www.ivo.se/publicerat-material/rapporter/blev-det-nagon-verkstad/)  
22 [verkstad/](https://www.ivo.se/publicerat-material/rapporter/blev-det-nagon-verkstad/)  
23 38 Vincent CA. Analysis of clinical incidents: a window on the system not a search for root  
24 causes. *Qual Saf Health Care* 2004;13:242-3. doi: 10.1136/qhc.13.4.242  
25 39 Taitz J, Genn K, Brooks V, et al. System-wide learning from root cause analysis: a report from  
26 the New South Wales Root Cause Analysis Review Committee. *Qual Saf Health Care*  
27 2010;19:e63. doi: 10.1136/qshc.2008.032144  
28 40 Dekker S, Cilliers, P, Hofmeyr, J-H. The complexity of failure: Implications of complexity  
29 theory for safety investigations. *Saf Sci* 2011;49:939-45. doi: 10.1016/j.ssci.2011.01.008  
30  
31  
32  
33  
34  
35  
36  
37  
38  
39  
40  
41  
42  
43  
44  
45  
46  
47  
48  
49  
50  
51  
52  
53  
54  
55  
56  
57  
58  
59  
60

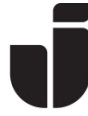

JÖNKÖPING UNIVERSITY  
*School of Health and Welfare*

2019-06-13

Dear Editors:

I wish to submit an original research article for publication in BMJ Open, titled “A retrospective study of investigations after suicide in Swedish healthcare.” The paper was co-authored by Axel Ros, MD, PhD, Professor Boel Andersson Gäre, MD, PhD, and Professor Åsa Westrin, MD, PhD.

This study aggregated the conclusions of all investigations conducted after suicides reported to the supervisory authority in Sweden in 2015. We believe that our study makes a significant contribution to the literature because it will help to inform healthcare providers of the typical causes of suicide related to healthcare and advance their work on improving patient safety.

This manuscript has not been published or presented elsewhere in part or in entirety and is not under consideration by another journal. We have read and understood your journal’s policies, and we believe that neither the manuscript nor the study violates any of these. There are no conflicts to declare. Although we examined the research checklists of the EQUATOR Network, none seemed applicable to our work.

Thank you for your consideration. I look forward to hearing from you.

Sincerely,  
Elin Roos af Hjelmsäter, MD

Department of Psychiatry, School of Health and Welfare Jönköping University  
Höglandssjukhuset, 575 81 Eksjö, Sweden  
+46 70 3577396  
elin.roos.af.hjelmsater@rjl.se

## Contributorship statement

### Elin Roos af Hjelmsäter

- Substantial contributions to the design of the work, analysis and interpretation of data
- Collected all data necessary for the study
- Drafting the work and revisions of the manuscript
- Final approval of the version of the manuscript to be published
- Agreement to be accountable for all aspects of the work in ensuring that questions related to the accuracy or integrity of any part of the work are appropriately investigated and resolved.

### Axel Ros, Boel Andersson Gäre and Åsa Westrin

- Did all and in equal parts contribute to design, analysis and interpretation of the study
- Did all and in equal parts contribute to revisions of the manuscript
- Final approval of the manuscript including agreement to be accountable for all aspects of the work in ensuring that questions related to the accuracy or integrity of any part of the work are appropriately investigated and resolved.

# BMJ Open

## Deficiencies in healthcare prior to suicide and actions to deal with them: A retrospective study of investigations after suicide in Swedish healthcare

|                                 |                                                                                                                                                                                                                                                                                                                                                                                                                                                                                                                                                                                                                                                                                                                                                         |
|---------------------------------|---------------------------------------------------------------------------------------------------------------------------------------------------------------------------------------------------------------------------------------------------------------------------------------------------------------------------------------------------------------------------------------------------------------------------------------------------------------------------------------------------------------------------------------------------------------------------------------------------------------------------------------------------------------------------------------------------------------------------------------------------------|
| Journal:                        | <i>BMJ Open</i>                                                                                                                                                                                                                                                                                                                                                                                                                                                                                                                                                                                                                                                                                                                                         |
| Manuscript ID                   | bmjopen-2019-032290.R1                                                                                                                                                                                                                                                                                                                                                                                                                                                                                                                                                                                                                                                                                                                                  |
| Article Type:                   | Original research                                                                                                                                                                                                                                                                                                                                                                                                                                                                                                                                                                                                                                                                                                                                       |
| Date Submitted by the Author:   | 12-Sep-2019                                                                                                                                                                                                                                                                                                                                                                                                                                                                                                                                                                                                                                                                                                                                             |
| Complete List of Authors:       | Roos af Hjelmsäter, Elin; Region Jönköping, Högländssjukhuset; Jönköping University, Jönköping Academy for Improvement of Health and Welfare, the School of Health and Welfare Jönköping University<br>Ros, Axel; Region Jönköping, Ryhov; Jönköping University, Jönköping Academy for Improvement of Health and Welfare, the School of Health and Welfare Jönköping University<br>Gäre, Boel Andersson; Hogskolan i Jonkoping Halsohogskolan, The Jönköping Academy for Improvement of Health and Welfare; Landstinget i Jonkopings lan, Futurum<br>Westrin, Åsa; Lund University, Faculty of Medicine, Department of Clinical Sciences, Lund, Division of Psychiatry; Region Skåne, Office for Psychiatry and Habilitation, Psychiatry Research Skåne |
| <b>Primary Subject Heading</b>: | Health services research                                                                                                                                                                                                                                                                                                                                                                                                                                                                                                                                                                                                                                                                                                                                |
| Secondary Subject Heading:      | Mental health                                                                                                                                                                                                                                                                                                                                                                                                                                                                                                                                                                                                                                                                                                                                           |
| Keywords:                       | Health & safety < HEALTH SERVICES ADMINISTRATION & MANAGEMENT, Quality in health care < HEALTH SERVICES ADMINISTRATION & MANAGEMENT, Risk management < HEALTH SERVICES ADMINISTRATION & MANAGEMENT, Adult psychiatry < PSYCHIATRY, Suicide & self-harm < PSYCHIATRY                                                                                                                                                                                                                                                                                                                                                                                                                                                                                     |
|                                 |                                                                                                                                                                                                                                                                                                                                                                                                                                                                                                                                                                                                                                                                                                                                                         |

SCHOLARONE™  
Manuscripts

1  
2  
3 **1 Title page**  
4  
5

6 2

7  
8 **3 Deficiencies in healthcare prior to suicide and actions to deal with them:**  
9

10 **4 A retrospective study of investigations after suicide in Swedish healthcare**  
11  
12

13 5

14  
15 **6 Corresponding author:**  
16

17 7 Elin Roos af Hjelmsäter, MD

18  
19 8 Högländssjukhuset, hus 34 pl 4

20  
21 9 575 82 Eksjö

22  
23 10 Sweden

24  
25 11 [elin.roos.af.hjelmsater@rjl.se](mailto:elin.roos.af.hjelmsater@rjl.se), phone number: +46703577396  
26  
27

28 12

29  
30 **13 Co-authors:**  
31

32 14 Axel Ros, MD, PhD, Region Jönköping County and Jönköping Academy for Improvement of Health  
33 and Welfare, the School of Health and Welfare Jönköping University, Jönköping, Sweden  
34

35 16 Boel Andersson Gäre, MD, PhD, Professor, Jönköping Academy for Improvement of Health and  
36 Welfare, the School of Health and Welfare Jönköping University, Jönköping and Futurum, Region  
37 Jönköping County, Jönköping, Sweden  
38

39  
40 19 Åsa Westrin, MD, PhD, Professor, Department of Clinical Sciences, Lund, Division of Psychiatry,  
41 Lund University and Psychiatry Research Skåne, Office for Psychiatry and Habilitation, Region  
42 Skåne, Sweden  
43

44 22

45  
46 23  
47

48  
49 **24 Word count** (excluding title page, abstract, references, figures and tables): 4235. Abstract: 268.  
50

51 25

52  
53 26  
54

55 27

56  
57 28  
58  
59  
60

## 1 **ABSTRACT**

### 2 **Objectives**

3 The overall aim of this study was to aggregate the conclusions of all investigations conducted after  
4 suicides reported to the supervisory authority in Sweden in 2015, and to identify deficiencies in  
5 healthcare found in these investigations; the actions proposed to deal with the deficiencies; the level of  
6 the organizational hierarchy (micro-meso-macro) in which the deficiencies and actions were situated;  
7 and outcomes of the supervisory authority's decisions.

### 8 **Design and setting**

9 This is a retrospective study of all reports from Swedish primary and secondary healthcare after  
10 suicide to the regulatory authority in Sweden in 2015.

### 11 **Results**

12 In 55% (n=240) of cases, healthcare providers reported healthcare deficiencies that contributed to  
13 suicide; these deficiencies were primarily in "suicide risk assessment" and "treatment." Actions aimed  
14 at preventing new suicides were proposed in 80% of cases (n=347). By far, the most frequent actions  
15 were "education and competence," present in 52% of cases (n=227) and did not much correspond with  
16 identified deficiencies. Sixty-five percent of the deficiencies and actions were at micro level, while the  
17 remainders were at meso level. In 65% (n=284) of cases, the supervisory authority approved the  
18 investigation without further requirements.

### 19 **Conclusions**

20 The most common identified deficiencies were related to care in the immediate interface between  
21 patient and staff. Actions proposed to prevent new suicides were centered on single educational  
22 interventions without distinctive sustainable effects in the organizations and usually did not  
23 correspond with the identified deficiencies. Future research should examine if application of a  
24 framework based on knowledge of the suicide process, suicide prevention strategies, and patient safety  
25 would enable more sophisticated investigations that could facilitate progress on suicide prevention.

### 26 **Article summary**

#### 27 **Strengths and limitations of this study**

- 28 • This is the first national aggregated analysis of the outcomes of investigations following  
29 suicides in Sweden.
- 30 • The categorization of deficiencies and actions for improvements was done by a single person  
31 to improve consistency.
- 32 • All data were based on the healthcare providers' reports of suicide to the supervisory  
33 authority, reports performed in different contexts by different persons with a large spectrum of  
34 disparities in experiences resulting in variegated quality.

## 1 BACKGROUND

2 Close to 800 000 people die by suicide worldwide every year.<sup>1</sup> Studies show that approximately nine  
3 out of ten individuals who die by suicide have a psychiatric disorder at the time of death, and a large  
4 proportion of suicide deaths occur among individuals receiving ongoing psychiatric care or who have  
5 contact with other healthcare providers.<sup>2-5</sup> There is some evidence that suicide prevention strategies  
6 diminish suicide rates<sup>6 7</sup>; however, despite intensified efforts to improve the healthcare safety for  
7 suicidal patients, the suicide rate has remained essentially the same in Sweden, at approximately 1200  
8 deaths every year.<sup>8</sup> In recent decades, awareness and knowledge of patient safety has increased. Many  
9 countries have established an incident reporting system, meaning that serious adverse events are to be  
10 investigated and reported to a supervisory authority. To better understand if failures in any area of the  
11 healthcare system have contributed to suicide, all suicides that occurred while a victim was receiving  
12 healthcare or within four weeks after healthcare contact were required to be reported by the healthcare  
13 provider to the supervisory authority for healthcare in Sweden in 2006-2017. A review conducted one  
14 year after this obligation was implemented showed that the supervisory authority criticized healthcare  
15 providers for healthcare deficiencies in 53% of cases, with the most frequent deficiencies being in  
16 routines and risk assessments.<sup>9</sup> Since that report, no further national aggregated analysis of the  
17 outcomes of the investigations following suicides has been done. To our knowledge, there are neither  
18 any international aggregated analyses nor other analysis of this kind published.

19 Investigations based on root cause analysis (RCA) have become wide-spread tools in healthcare  
20 services efforts to understand and prevent adverse events.<sup>10 11</sup> The principle of RCA is to identify and  
21 rectify underlying system vulnerabilities that allow human errors to cause harm to patients.<sup>12</sup> This  
22 approach assumes that adverse outcomes can be explained by linear cause-effect chains and have  
23 causes that can be found and fixed, and that the actions preceding adverse events differ from those that  
24 precede ordinary, successful care.<sup>13</sup> The actual value of incident reporting systems and the RCA  
25 approach in healthcare is subject to debate.<sup>14-18</sup> Single analyses usually provide little learning beyond  
26 the involved staff and unit. Rather, aggregation of data from multiple analyses should generate more  
27 meaningful action plans for improvement and better facilitate the learning processes in organizations.

28 Swedish law states that when an adverse event has resulted or could have resulted in severe patient  
29 harm, this should be reported to the supervisory authority, the Health and Social Care Inspectorate  
30 (HaSCI). The role of HaSCI is to "...ensure that reported adverse events have been investigated to a  
31 necessary extent, and that appropriate actions have been taken by the healthcare provider to reach a  
32 high level of patient safety".<sup>19</sup> The report to the authority is to be preceded by an investigation of the  
33 healthcare services provided to the patient before the adverse event, conducted by the healthcare  
34 providing organization. The head of the departments are formally responsible for the investigation and  
35 investigators can be any type of healthcare professional. The investigations aim to identify the causes  
36 and contributory causes of the incident and to identify improvements that should prevent the same  
37 incident from happening again. A distinction is made in investigations between actions performed  
38 immediately after an incident and non-immediate actions proposed or taken some time afterwards. The  
39 authority then examines the investigation and decides if the healthcare provider has fulfilled their  
40 legislated role of investigating the incident and taking actions to ensure patient safety. If there are  
41 shortcomings in the investigation, the HaSCI calls for additions or conducts a site visit to inspect the  
42 healthcare provider.

43 The overall aim of this study was to aggregate the conclusions of all investigations conducted after  
44 suicides reported to the supervisory authority in Sweden in 2015, and to identify deficiencies in  
45 healthcare found in these investigations; the actions proposed to deal with the deficiencies; the level of



1 the organizational hierarchy (micro-meso-macro) in which the deficiencies and actions were situated;  
2 and outcomes of the supervisory authority's decisions.

### 3 METHODS

#### 4 Cases

5 All suicide cases (n=436) reported to the HaSCI in 2015 were included. Complete incident  
6 investigations from healthcare providers with associated patient records and decisions of the  
7 supervisory authority were obtained from the supervisory authority. Every individual suicide was  
8 given a code number and the patient's demographic data, contact with all areas of healthcare and  
9 received treatment in the three months before death were registered. Major diagnoses documented and  
10 coded in accordance with the ICD-10 coding system in the records were registered.

#### 11 Categorization of data

12 A coding scheme was used to categorize the causes and contributory causes of the suicide, as well as  
13 the immediately performed actions and non-immediate actions reported in the investigations. The  
14 coding scheme was based on the general categories of the most widespread method of investigating  
15 adverse events in Swedish healthcare, which is based on RCA.<sup>20</sup> The categories were as follows:  
16 Education and competence, Communication and information, Organization and management,  
17 Technics and equipment, and Policies and procedures. To make the categorization more specific, four  
18 of the major categories were divided into additional subcategories. Every category was described and  
19 exemplified and a category of "others" was added in case none of the other categories was considered  
20 appropriate (*Table 1*). Since the providers rarely made a distinction between causes and contributory  
21 causes in the investigations, these are reported as *deficiencies* in this paper. In this study, an action  
22 (immediate or non-immediate) was defined as an intervention that aimed to prevent new suicides.  
23 Therefore, actions taken to prevent reported suicides (telephone calls, resuscitations) or actions aimed  
24 at informing family or staff that a suicide has occurred were not registered as actions in this study.  
25 Separate notes were made when a deficiency or action was related to routines and if patient-related  
26 factors were reported. In cases where different providers reported the same suicide case, the outcomes  
27 of the investigations were grouped. Identical deficiencies or actions reported by different providers  
28 regarding the same patient were excluded, thus ensuring that every factor was counted only once. How  
29 learning from the investigation was described; inside the department, outside the department,  
30 irrelevant or not mentioned, was registered. All data collection and categorization was conducted by  
31 only one researcher, an experienced psychiatrist, to achieve consistency.

32 **Table 1. Coding scheme for categories with examples of deficiencies and actions**

| Category and definition                                                                                                                                             | Examples of deficiencies                                                                                                                                                                                      | Examples of actions                                                                                                                                                                                            |
|---------------------------------------------------------------------------------------------------------------------------------------------------------------------|---------------------------------------------------------------------------------------------------------------------------------------------------------------------------------------------------------------|----------------------------------------------------------------------------------------------------------------------------------------------------------------------------------------------------------------|
| <b>Communication and information</b>                                                                                                                                |                                                                                                                                                                                                               |                                                                                                                                                                                                                |
| <b>Communication with peers and family</b>                                                                                                                          |                                                                                                                                                                                                               |                                                                                                                                                                                                                |
| Deficiencies and actions related to cooperation, communication, information, and interaction between the healthcare provider and the families and peers of patients | Shortcomings in provision of adequate information about healthcare from provider to family/peers<br>Absence of or inadequacies in the providers' contact with family/peers at time of discharge from hospital | New routines for involving family/peers in healthcare<br>New written information about psychiatric disorders and treatment<br>"Courses" or lectures for family/peers about psychiatric disorders and treatment |
| <b>Documentation</b>                                                                                                                                                |                                                                                                                                                                                                               |                                                                                                                                                                                                                |

|                                                                                                                                                  |                                                                                                                                      |                                                                                                                                       |
|--------------------------------------------------------------------------------------------------------------------------------------------------|--------------------------------------------------------------------------------------------------------------------------------------|---------------------------------------------------------------------------------------------------------------------------------------|
| Deficiencies and actions related to administration and documentation                                                                             | Non-adherence to local documentation policies<br>Inadequate, missing, wrong, or delayed documentation in patient records             | Patient record reviews for quality improvement<br>New guidelines or routines for the documentation process                            |
| <b>External communication</b>                                                                                                                    |                                                                                                                                      |                                                                                                                                       |
| Deficiencies and actions related to cooperation, communication, and collaboration with actors outside the unit/clinic of the healthcare provider | Absence of or inadequacies in information provided at discharge from hospital to other care providers involved in the patient's care | New meeting points for cooperation between different healthcare providers, consultation meetings                                      |
| <b>Internal communication</b>                                                                                                                    |                                                                                                                                      |                                                                                                                                       |
| Deficiencies and actions related to cooperation, communication, and interaction between staff within the unit, and between staff and patient     | Lack of sharing of important information regarding care between staff, or between staff and patient                                  | New routines for intern communication/reports, written or oral                                                                        |
| <b>Education and competence</b>                                                                                                                  |                                                                                                                                      |                                                                                                                                       |
| <b>Education and competence, not specified</b>                                                                                                   |                                                                                                                                      |                                                                                                                                       |
| Deficiencies and actions related to education and competence, excluding those related to suicide risk assessments                                | Inadequacies in competence or experience of staff<br>Inadequate supervision or introduction of staff                                 | Case report discussions at staff meetings, lectures<br>Reminding staff of existing guidelines                                         |
| <b>Education and competence in suicide risk assessment</b>                                                                                       |                                                                                                                                      |                                                                                                                                       |
| Deficiencies and actions related to education and competence in suicide risk assessment                                                          | Inadequate knowledge or experience of staff to conduct a sufficient suicide risk assessment                                          | Lectures and training in suicide risk assessment<br>Reminding staff about existing policies and guidelines of suicide risk assessment |
| <b>Technics and equipment</b>                                                                                                                    |                                                                                                                                      |                                                                                                                                       |
| Deficiencies and actions regarding technics and equipment                                                                                        | Ligature points (hooks, doors) in hospital<br>Shortcomings in information technology systems                                         | Removal of ligature points (hooks, doors) in hospital<br>Changes in information technology systems                                    |
| <b>Organization and management</b>                                                                                                               |                                                                                                                                      |                                                                                                                                       |
| <b>Human resources</b>                                                                                                                           |                                                                                                                                      |                                                                                                                                       |
| Deficiencies and actions involving staffing, care availability, and psychological working environment                                            | Lack of staff<br>Lack of staff continuity<br>Temporary (rented) doctors<br>Heavy workload                                            | Recruiting new staff<br>Changes in working schedule<br>Changes in job assignments and work distribution between staff                 |
| <b>Number of beds in hospital</b>                                                                                                                |                                                                                                                                      |                                                                                                                                       |
| Deficiencies and actions related to available beds in hospital                                                                                   | Patient not admitted to inpatient care or discharged because no beds were available                                                  | Efforts to expand the number of beds in hospital                                                                                      |
| <b>Organization/management</b>                                                                                                                   |                                                                                                                                      |                                                                                                                                       |
| Deficiencies and actions related to leadership, organizational structure of healthcare, and physical working environment                         | Organizational structures impairing healthcare<br>Shortcomings in leaders' execution of responsibility                               | Organizational reconstructions<br>Rebuilding of premises                                                                              |

|                                                                                                                                       |                                                                                                                                                    |                                                                                                                                                            |
|---------------------------------------------------------------------------------------------------------------------------------------|----------------------------------------------------------------------------------------------------------------------------------------------------|------------------------------------------------------------------------------------------------------------------------------------------------------------|
|                                                                                                                                       | Inadequate premises                                                                                                                                |                                                                                                                                                            |
| <b>Policies and procedures</b>                                                                                                        |                                                                                                                                                    |                                                                                                                                                            |
| <b>Care plan and crisis plan</b>                                                                                                      |                                                                                                                                                    |                                                                                                                                                            |
| Deficiencies and actions related to care plan or crisis plan                                                                          | Inadequate or lack of care plan/ crisis plan                                                                                                       | New routines for making care plan /crisis plan or follow up                                                                                                |
| <b>Diagnosis</b>                                                                                                                      |                                                                                                                                                    |                                                                                                                                                            |
| Deficiencies and actions related to the diagnostic process                                                                            | Delayed, missed, wrong, or inadequate diagnosis                                                                                                    | New guidelines or routines for the diagnostic process                                                                                                      |
| <b>Suicide risk assessment</b>                                                                                                        |                                                                                                                                                    |                                                                                                                                                            |
| Deficiencies and actions related to the process of suicide risk assessment                                                            | Non-adherence to local policy or guidelines for suicide risk assessment<br>Inadequate risk assessment                                              | New guidelines or routines for suicide risk assessments                                                                                                    |
| <b>Treatment</b>                                                                                                                      |                                                                                                                                                    |                                                                                                                                                            |
| Deficiencies and actions related to treatment of the patient                                                                          | Complications or side-effects of medication/treatment<br>Delayed, inadequate, or wrong medication/treatment<br>Doctors' prescribing                | New guidelines, recommendations, or routines for treatment strategies for specific disorders<br>New recommendations for prescription of psychotropic drugs |
| <b>Work process</b>                                                                                                                   |                                                                                                                                                    |                                                                                                                                                            |
| Deficiencies and actions related to the daily working process of staff and the process of reporting and taking care of adverse events | Non-adherence to local policies, routines, or checklists regarding working process of staff<br>Inadequacies in supervision of patients in hospital | New guidelines or routines regarding working process for staff<br>New routines in the process of reporting and taking care of adverse events               |
| <b>Others</b>                                                                                                                         |                                                                                                                                                    |                                                                                                                                                            |
| Deficiencies and actions not specified elsewhere                                                                                      |                                                                                                                                                    |                                                                                                                                                            |

## Organizational levels

A classification of the organizational levels of deficiencies and actions was conducted to better understand where in the organizational system the identified deficiencies and actions were situated. The deficiencies and actions were coded according to a micro-meso-macro-perspective.<sup>21</sup> Microsystems were defined as the basic building blocks of all healthcare systems formed around the patient and family, such as the inpatient or outpatient care unit. The mesosystem encompassed interactions between different microsystem units, such as cooperation between clinics or healthcare providers. The macrosystem involved the whole system of healthcare, such as legislation, political prioritizations, and national policies on healthcare. The highest organizational level for each deficiency, immediate action, and non-immediate action for each case was coded.

## Supervisory authority

The decisions of the supervisory authority were coded as follows: "immediate approval," "request for one or more additions," or "inspection."

## Statistical analyses

Summary statistics were calculated for deficiencies, immediate actions, non-immediate actions, and decisions of the supervisory authority. Frequencies for each category and organizational hierarchical level in deficiencies, immediate actions, and non-immediate actions were analyzed per individual and aggregated.

Chi-square tests of independence were used to compare the number of deficiencies and non-immediate actions in the same category. We considered a two-sided p-value of  $<.005$  to be statistically significant. Fisher's exact test was used in cases where 20% of the analyzed groups had an expected count of less than 5. The statistical analyses were performed using IBM SPSS Statistics 24.

### Ethical review

According to the Swedish *Act Concerning the Ethical Review of Research Involving Humans* (2003:460) and an advisory opinion from the Regional Ethical Review Board (no. 2017/234), this study did not require ethical review as it did not include human participants.

### Patient and Public Involvement

Patients or public were not involved in this study.

## RESULTS

### Cases

In total, 1179 suicides were registered in Sweden in 2015.<sup>8</sup> The supervisory authority received 473 reports. In 35 cases, the same suicide was reported by two different healthcare providers, regarding different parts and perspectives of the care process, and for one case, the same suicide was reported by three providers, resulting in 436 unique suicide cases. Characteristics of the cases and healthcare received in the last three months before suicide are presented in *Table 2*.

**Table 2. Characteristics of cases and care received during the last three months before suicide (including all areas of healthcare; primary and secondary, psychiatric and somatic)**

| Characteristic                                                                                      |                              | n (%)    |
|-----------------------------------------------------------------------------------------------------|------------------------------|----------|
| <b>Gender</b>                                                                                       | Men                          | 283 (65) |
|                                                                                                     | Women                        | 152 (35) |
| <b>Age, years</b>                                                                                   | Median 49, range 13-93       |          |
| <b>Healthcare provider last in contact with the patient</b>                                         | Psychiatric care             | 290 (67) |
|                                                                                                     | Primary care                 | 94 (22)  |
|                                                                                                     | Somatic care                 | 33 (8)   |
|                                                                                                     | Other                        | 18 (4)   |
| <b>Time until death after last contact with healthcare system, days</b>                             | Median 4, range 0-88         |          |
| <b>Number of contacts with outpatient healthcare services during the last three months</b>          | 1                            | 38 (9)   |
|                                                                                                     | 2-4                          | 105 (24) |
|                                                                                                     | >5                           | 216 (50) |
| <b>Inpatient care</b>                                                                               | During the last three months | 146 (33) |
|                                                                                                     | Inpatient at time of death   | 36 (8)   |
| <b>Major psychiatric diagnosis documented and coded in accordance with ICD-10 in patient record</b> | Total (F00-F98)              | 370 (85) |
|                                                                                                     | Affective disorder (F30)     | 153 (35) |
|                                                                                                     | Anxiety disorder (F40)       | 77 (18)  |
|                                                                                                     | Substance abuse (F10)        | 51 (12)  |
|                                                                                                     | Psychosis (F20)              | 36 (8)   |

|                                                                                              |                                  |          |
|----------------------------------------------------------------------------------------------|----------------------------------|----------|
|                                                                                              | Attention deficit disorder (F90) | 20 (5)   |
|                                                                                              | Personality disorder (F60)       | 13 (3)   |
|                                                                                              | Autism spectrum (F84)            | 13 (3)   |
|                                                                                              | Other                            | 7 (2)    |
| <b>Prescribed psychotropic drugs at time of death</b>                                        | Total                            | 349 (80) |
|                                                                                              | Hypnotic drugs                   | 274 (63) |
|                                                                                              | Antidepressants                  | 265 (61) |
|                                                                                              | Anxiolytics                      | 216 (50) |
|                                                                                              | Antipsychotics, oral             | 97 (22)  |
|                                                                                              | Antipsychotics, injection        | 18 (4)   |
| <b>Suicide risk assessment documented in patient record in the three months before death</b> | Absent                           | 108 (25) |
|                                                                                              | Low/nonexistent                  | 171 (39) |
|                                                                                              | Elevated, not acute              | 116 (27) |
|                                                                                              | High/acute                       | 41 (9)   |

## 2 Deficiencies in healthcare before suicide

3 In 55% (n=240) of suicide cases, the healthcare provider identified deficiencies in the healthcare that  
4 were considered to have contributed to the suicide. Among all cases, a total of 952 deficiencies were  
5 identified. The number of deficiencies per case ranged from 1 to 21, with a median of 3.

6 The most frequent deficiencies were in “treatment” and “suicide risk assessment”. Examples were  
7 inadequate or delayed pharmacological treatment, non-adherence to existing guidelines, inadequacies  
8 in doctors’ prescribing, a misleading suicide risk assessment, and non-adherence to local guidelines  
9 for suicide risk assessment. Deficiencies in “external communication” were the third most frequent.  
10 Examples were shortcomings in communication between a somatic and psychiatric clinic and a lack of  
11 important information being handed over from one healthcare provider to another. For further details,  
12 see *Tables 3 and 4*. In 7 cases, identical deficiencies for the same case were reported by different  
13 providers, categorized as “external communication”, “treatment”, “suicide risk assessment” and “care  
14 plan.”

**Table 3. Proportions of cases with deficiencies, immediate actions, and non-immediate actions reported in the investigations of healthcare made after suicide.**

| Category                                            | Cases with deficiencies n (%) | Cases with immediate actions n (%) | Cases with non-immediate actions n (%) |
|-----------------------------------------------------|-------------------------------|------------------------------------|----------------------------------------|
| <b>All cases</b>                                    | 240 (55)                      | 26 (6)                             | 347 (80)                               |
| <b>Communication and information</b>                |                               |                                    |                                        |
| Communication with peers and family                 | 51 (12)                       | 2 (0.5)                            | 51 (12)                                |
| Documentation                                       | 65 (15)                       | 1 (0.2)                            | 71 (16)                                |
| External communication                              | 74 (17)                       | 2 (0.5)                            | 80 (18)                                |
| Internal communication                              | 61 (14)                       | 0 (0)                              | 55 (13)                                |
| <b>Education and competence</b>                     |                               |                                    |                                        |
| Education and competence not specified              | 54 (11)                       | 1 (0.2)                            | 166 (38) <sup>a</sup>                  |
| Education and competence in suicide risk assessment | 9 (2)                         | 6 (1)                              | 136 (31) <sup>a</sup>                  |
| <b>Organization and management</b>                  |                               |                                    |                                        |

|                                |         |         |                       |
|--------------------------------|---------|---------|-----------------------|
| Human resources                | 60 (14) | 6 (1)   | 67 (15)               |
| Number of beds                 | 9 (2)   | 0 (0)   | 4 (1)                 |
| Organization/management        | 13 (3)  | 2 (0.5) | 22 (5) <sup>b</sup>   |
| <b>Policies and procedures</b> |         |         |                       |
| Treatment                      | 84 (19) | 2 (0.5) | 57 (13) <sup>c</sup>  |
| Suicide risk assessment        | 86 (20) | 6 (1)   | 94 (22)               |
| Work process                   | 50 (11) | 6 (1)   | 119 (27) <sup>a</sup> |
| Diagnostics                    | 54 (12) | 2 (0.5) | 28 (6) <sup>c</sup>   |
| Care plan and crisis plan      | 46 (11) | 0 (0)   | 46 (11)               |
| <b>Technics and equipment</b>  |         |         |                       |
| Other                          | 11 (3)  | 1 (0.2) | 8 (2)                 |

1

2 <sup>a</sup> significantly more cases with reported non-immediate actions compared with deficiencies,  $p < 0.0001$ 3 <sup>b</sup> significantly more cases with reported non-immediate actions compared with deficiencies,  $p < 0.002$ 4 <sup>c</sup> significantly more cases with reported deficiencies compared with non-immediate actions,  $p < 0.0001$ 

**Table 4. Total number of deficiencies, immediate actions, and non-immediate actions reported in the investigations of healthcare made after suicide.**

| Category                                            | Total number of deficiencies, n | Total number of immediate actions, n | Total number of non-immediate actions, n |
|-----------------------------------------------------|---------------------------------|--------------------------------------|------------------------------------------|
| Total number reported in all investigations         | 952                             | 45                                   | 1330                                     |
| <b>Communication and information</b>                |                                 |                                      |                                          |
| Communication with peers and family                 | 61                              | 2                                    | 56                                       |
| Documentation                                       | 87                              | 1                                    | 84                                       |
| External communication                              | 103                             | 2                                    | 109                                      |
| Internal communication                              | 77                              | 0                                    | 59                                       |
| <b>Education and competence</b>                     |                                 |                                      |                                          |
| Education and competence not specified              | 73                              | 1                                    | 261                                      |
| Education and competence in suicide risk assessment | 9                               | 6                                    | 168                                      |
| <b>Organization and management</b>                  |                                 |                                      |                                          |
| Human resources                                     | 81                              | 7                                    | 86                                       |
| Number of beds                                      | 10                              | 0                                    | 4                                        |
| Organization/management                             | 14                              | 3                                    | 27                                       |
| <b>Policies and procedures</b>                      |                                 |                                      |                                          |
| Treatment                                           | 115                             | 2                                    | 72                                       |
| Suicide risk assessment                             | 101                             | 6                                    | 112                                      |
| Work process                                        | 74                              | 6                                    | 161                                      |
| Diagnostics                                         | 70                              | 2                                    | 33                                       |
| Care plan and crisis plan                           | 50                              | 0                                    | 57                                       |
| <b>Technics and equipment</b>                       |                                 |                                      |                                          |
| Technics and equipment                              | 16                              | 6                                    | 33                                       |

|              |    |   |   |
|--------------|----|---|---|
| <b>Other</b> |    |   |   |
| Other        | 11 | 1 | 8 |

Note: Each case can be represented by several factors in the same category. Total numbers of reported factors in the investigations (n) are given in the table.

All reported deficiencies were at the micro level in 65% (n=157) of cases (Table 5). An example of a deficiency at the micro level was inadequacies in doctors’ prescribing or in suicide risk assessment. The remaining 35% (n=83) had at least one deficiency at the meso level, such as shortcomings in cooperation between a psychiatric clinic and somatic clinic or inadequacies in communication between hospital and municipality. No deficiencies were considered to be at the macro level.

| Organizational level | Deficiencies | Immediate actions | Non-immediate actions |
|----------------------|--------------|-------------------|-----------------------|
| Micro                | 157 (65)     | 25 (96)           | 225 (65)              |
| Meso                 | 83 (35)      | 1 (4)             | 120 (35)              |
| Macro                | 0 (0)        | 0 (0)             | 1 (0)                 |

Note: Only the highest level in every case is noted. Number and percentage of cases at each level are given in the table, n (%).

**Routines**

Deficiencies in routines were reported in 20% (n=96) of all cases. These often reflected non-adherence to existing routines. Missing or defective routines were reported in 11% (n=49) of cases. Deficiencies in routines could occur in any category.

**Patient-related factors**

In 31% (n=135) of cases, patient-related factors were reported to have contributed to the suicide. Examples were changes in the patient’s private relationships or life conditions, or circumstances the provider considered to be outside the influence of healthcare.

**Immediately performed actions**

Immediately performed actions were reported in 6% (n=26) of cases. In these, 45 immediate actions were described. The number of immediate actions per case ranged from 1 to 7, with a median of 1. The most frequent immediate actions taken were categorized as “human resources,” usually recruitment of physicians (Tables 3 and 4). In one case, there was an action at the meso level; the remainders were all at the micro level (Table 5).

**Non-immediate actions**

Non-immediate actions aiming to prevent new suicides were taken or proposed in 80% (n=347) of all cases. In these, a total of 1330 interventions were described. The number of actions per case ranged from 1 to 20, with a median of 3.

The most frequent non-immediate actions were in the category of “education and competence not specified.” Examples were case report discussions at staff meetings, lectures about affective disorders,

1 and reminding staff about existing local guidelines. The second most frequently reported non-  
2 immediate action category was “education and competence in suicide risk assessment.” Examples  
3 were lectures for staff about suicide risk assessment and reminding staff about existing guidelines for  
4 suicide risk assessment. Together, non-immediate actions in either of these two categories were  
5 described in 52% (n=227) of all cases, corresponding to 32% of all reported non-immediate actions.

6 The third most frequent non-immediate action category was changes in “work process.” Examples  
7 were new checklists and changes in the intern system of reporting adverse events. For further details,  
8 see *Tables 3 and 4*. Identical actions regarding the same case were reported by different providers in  
9 12 cases and were in the categories of “external communication,” “education and competence not  
10 specified,” “suicide risk assessment,” “care plan,” “work process” and “education and competence in  
11 suicide risk assessment.”

12 The organizational levels of the non-immediate actions were equal to those of the deficiencies; in 65%  
13 (n=225) of the cases, all actions were at the micro level and in 35% (n=120) there was at least one  
14 action at the meso level (*Table 5*). Examples of actions at the micro level were case discussions at staff  
15 meetings, lectures, and new checklists. Examples of actions at the meso level were changed  
16 procedures for communication or cooperation between different healthcare providers. Only one  
17 proposal was at the macro level, and this involved the possibility of the prescribing doctor checking  
18 what medications a patient received from pharmacies throughout the country.

19 Learning from the investigations were described to be inside the department in 56% (n=266) of the  
20 reports. In only 4% (n=20) of the reports, sharing of the experiences and conclusions outside the own  
21 department were described. In all other reports, nothing was mentioned about the learning or  
22 considered not being relevant.

### 23 Routines

24 Changes in routines were proposed in 35% (n=152) of all cases, and these actions could be in any  
25 category.

### 26 Decisions of the supervisory authority

27 In 65% (n=284) of cases, the supervisory authority approved the report from the healthcare provider  
28 without further requirements. In 29% (n=126), the supervisory authority called for one or more  
29 additions to the investigation before approval. In 6% (n=25), an inspection took place at the healthcare  
30 provider before the decision, and in these cases the supervisory authority usually called for additional  
31 actions before their decision. Of the 36 cases with more than one investigation, the decisions of the  
32 authority differed in 16 cases.

## 33 DISCUSSION

34 This study describes the aggregate results of healthcare provider investigations made after suicides in  
35 Sweden in 2015. In more than half of the studied cases, there were deficiencies in the healthcare  
36 provided before suicide that were considered by the providers to be of significance to the death. The  
37 majority of the deficiencies were at the micro organizational level, and no deficiency was found at the  
38 macro level. The most common deficiencies involved care delivered in the immediate interface  
39 between patient and staff, which were relatively easy for the investigators to identify. Actions to deal  
40 with the deficiencies were substantially more frequent than the number of described deficiencies and



1  
2  
3 1 were dominated by educational actions. The majority of the actions were at the micro level, and only  
4 2 one proposed action was at the macro level.

6 3 The most frequently reported deficiencies were related to “treatment.” Four out of five patients in this  
7 4 study were prescribed psychotropic drugs, most commonly sleeping pills and antidepressants.  
8 5 Pharmacological treatment of psychiatric disorders is regarded as a central and evidence-based  
9 6 component of the prevention of suicide.<sup>7,22</sup> To deliver the right treatment for the patient, correct  
10 7 diagnoses are essential: diagnostic errors are known to be common causes of adverse events in all  
11 8 areas of healthcare.<sup>23,24</sup> A majority of the patients in this study had at least one documented psychiatric  
12 9 diagnosis, although less than half had a diagnosis of depression. The deficiencies in “diagnosis”  
13 10 category were lower than would be expected, given the known outcome of suicide, the fact that all  
14 11 cases had contact with healthcare shortly before death, and the fact that a vast majority of suicide  
15 12 deaths involve individuals who meet the diagnostic criteria for depression at time of death.<sup>5</sup> Many  
16 13 investigations were performed without the participation of a physician, which could help explain the  
17 14 low number of reported diagnostic errors.

21 15 Admission to inpatient care is a common choice of treatment for those at risk of suicide. One third of  
22 16 the patients in this study were admitted to the hospital in the three months before their death; however,  
23 17 only 8% of the suicide deaths involved inpatients, which is notably lower than the 24% found in a  
24 18 review of suicides in Sweden in 2007.<sup>9</sup> This decrease could be a result of safer inpatient care;  
25 19 however, it could also reflect a shift of suicides from inpatient care to the post-discharge period,  
26 20 mirroring the reduction in the number of beds in psychiatric care during the last few decades.<sup>25</sup>  
27 21 However, investigators in the present study did not reach this conclusion, as the number of hospital  
28 22 beds was reported as contributing to suicides in only 2% of cases. At the same time, it is not clear if  
29 23 this low frequency resulted because investigators considered this to be an issue outside their mandate.

33 24 Deficiencies in “suicide risk assessment” were frequently reported, as exemplified by inadequate  
34 25 performance of risk assessment or insufficient supervision of patients assessed to be at high risk for  
35 26 suicide at psychiatric inpatient units. All cases in this study were in contact with healthcare services  
36 27 during the three months before their suicide, and 90% were in contact more than once. Documentation  
37 28 of suicide risk in patients’ records during the last three months before suicide was absent in 25% of  
38 29 cases and regarded as low/nonexistent in 39%. Suicide is usually the final outcome of a process over  
39 30 time and involves the interaction of several factors. As suicide intentions also fluctuate rapidly,  
40 31 assessments must be repeated to catch suicidal crises.<sup>6</sup> The small number of cases in this study where  
41 32 suicide risk was assessed as high might reflect difficulties in assessments. However, it could also  
42 33 indicate success of healthcare in cases when suicide risk was assessed as high and then followed by  
43 34 preventive actions. Further research is needed to confirm this hypothesis.

47 35 Substantially more actions to prevent new suicides were reported compared to the number of identified  
48 36 deficiencies, possibly reflecting insights into the weaknesses of the healthcare system that confer risk  
49 37 to patient safety. The proposed actions centered on educational interventions: these actions were  
50 38 proposed for half of cases and corresponded to one third of all reported actions. In comparison,  
51 39 deficiencies in “education and competence” were reported in only 10% of cases, indicated that  
52 40 providers aimed to solve deficiencies in different categories with educational actions. Most of the  
53 41 proposed educational actions represented a single case discussion or reminder of a routine in staff  
54 42 meetings, suggesting that the deficiencies were being simplified and quick fixes were being applied.  
55 43 Evidence that educational interventions reduce suicide rates relies on studies of extensive education  
56 44 programs.<sup>26-30</sup> In order to reach successful implementation and sustainable behavior change,  
57 45 considerable work - including long-term multi-faceted interventions - is usually needed. Macrae

1  
2  
3 1 emphasizes the importance of active reflection, mindful participation, and emotional engagement.<sup>31 32</sup>  
4 2 If this kind of reflection is not part of how healthcare providers promote learning, the large amount of  
5 3 single educational actions can create a false sense of security without making the organization safer.  
6 4 Strong leadership with visible engagement in patient safety at all levels is of high importance in  
7 5 shaping and maintaining safe structures in organizations.<sup>32-36</sup> Very few deficiencies regarding  
8 6 management were reported in this study, probably reflecting the investigators' lack of understanding  
9 7 of this issue rather than an absence of management shortcomings.

10 8 Even though missing or defective routines seldom were reported as contributing to suicides, new or  
11 9 changed routines were proposed to prevent new suicides in one third of the investigations, often in the  
12 10 category of "work process." This focus on routines in patient harm investigations has been shown  
13 11 before.<sup>9 35 37</sup> Well-functioning work processes and adherence to routines are indisputably of high  
14 12 importance for ensuring safe healthcare. However, the large number of changes without corresponding  
15 13 shortcomings shown in this study might result in insecurity, rather than safety, among staff. This  
16 14 suggests that providers oversimplify the challenges of patient safety at the frontlines of healthcare.

17 15 Immediate action was taken in only a few cases, which probably reflects the absence of obvious  
18 16 deficiencies possible to be fixed. Compared to non-immediate actions, a larger share of immediate  
19 17 actions concerned "technics and equipment," usually the removal of ligature points such as hooks and  
20 18 doors.

21 19 A majority of identified deficiencies and actions were at the organizational micro level – they were  
22 20 usually within the care unit where the patient had their last contact with healthcare services. These  
23 21 findings were similar to those of a prior Swedish study.<sup>18</sup> The results probably reflect the  
24 22 investigators' knowledge and understanding of suicide and what they consider can be fixed more than  
25 23 the actual circumstances. The real purpose of investigations of healthcare after adverse events should  
26 24 be to reveal gaps and inadequacies in the healthcare system and to find effective and meaningful  
27 25 actions leading to sustainable improvement of healthcare.<sup>38</sup> To succeed in this, we need to develop  
28 26 methods appropriate to current healthcare services and to improve the ability of healthcare  
29 27 organizations to learn from and recall incidents and investigation outcomes.<sup>10 31 32</sup> In this study,  
30 28 learning from the investigations were in most cases described to be inside the own department, sharing  
31 29 of the experiences and conclusions outside the own department were described in only a few cases.  
32 30 Past studies have shown that the results and conclusions of investigations are rarely passed down to  
33 31 the organization and that there is an absence of formalized organizational memory, even though many  
34 32 patient safety activities that arise from the investigations after incidents are based on such memory-  
35 33 making activities.<sup>18 39</sup> Vincent suggests the use of a "safety analysis of the patient journey" to identify  
36 34 the series of events and combinations of errors and system vulnerabilities that in combination and  
37 35 gradually unfold over time.<sup>32</sup> Analyses over a longer period of time would enable identification of  
38 36 successful recovery from suicidal crises, which is necessary knowledge to progress in work on suicide  
39 37 prevention. This approach also requires investigators to view care through the eyes of patients,  
40 38 understand the patient's journey in the care system, and to grasp the reality of the complex healthcare  
41 39 system the patient and next of kin have to navigate. Attention to interactions between different levels  
42 40 of the organization is also needed. What happens at the micro level, such as in personal meetings with  
43 41 patients, reflects decisions and management at the top of the healthcare organization; as well what  
44 42 happens at the micro level influences top-level decisions.<sup>40</sup> These reflections on time, patient  
45 43 perspectives, and organizations were generally nonexistent in the investigations in this study but  
46 44 appear necessary to achieve progress in the care of suicidal patients.

1  
2  
3 1 The deficiencies in healthcare reported by the healthcare providers were in their investigations  
4 2 considered to be contributing factors to the completed suicide. This way of describing contributing  
5 3 factors is according to Swedish law and the RCA method. Healthcare and the suicide process both are  
6 4 complex processes, and such a linear approach might not be appropriate. This study illustrates how  
7 5 suicide as a possible patient harm is investigated in a nation where a RCA-inspired method is the  
8 6 recommended method, and what kind of learning and change in the health care systems that are  
9 7 possible with that approach. The result implies that sharper methods of investigation are needed to  
10 8 achieve progress in patient safety.

### 9 **Limitations and strengths**

10 All data were based on the healthcare providers' reports of suicide to the supervisory authority. The  
11 contents in these reports are regulated by law; however, there still may have been shortcomings and  
12 inadequacies not pointed out and that the authority did not observe. The investigations were performed  
13 in different contexts by different persons with a large spectrum of disparities in experiences resulting  
14 in variegated quality. The investigations were performed after suicides, which often upset and strongly  
15 affect involved staff, and an awareness of external supervision might have biased the outcomes.  
16 Furthermore, there is no national taxonomy for categorization of deficiencies and actions; a coding  
17 scheme was therefore created and used in this study. The category of "others" was used only in a few  
18 cases, suggesting the categories in the coding scheme covered most of the reported deficiencies and  
19 actions.

20 The strengths of this study are that the data collection and categorization were conducted by only one  
21 researcher, an experienced psychiatrist, to achieve consistency, and that the data were population-  
22 based. This study was performed almost a decade after the obligation to report suicides was  
23 implemented and most providers and investigators would have been familiar with the procedure.  
24 Therefore, the cases in the study are expected to match the actual numbers to a good extent and the  
25 investigations are expected to be representative for suicides completed by patients in contact with  
26 healthcare within four weeks before death.

### 27 28 **Conclusions**

29  
30 Many of the individuals who died by suicide were in contact with healthcare services shortly before  
31 death, and deficiencies in healthcare considered to be of significance to these deaths were reported for  
32 more than half of these patients. The majority of reported deficiencies and actions were at the  
33 organizational micro level and the most common deficiencies related to care delivered in the  
34 immediate interface between patient and involved staff, which was easy for the investigators to  
35 identify. Actions proposed to prevent new suicides were centered on single educational interventions  
36 without distinctive sustainable effects in the organizations and usually did not correspond with the  
37 identified deficiencies. Conclusions from the investigations usually stayed inside the own department,  
38 systematic sharing and learning from experiences should be a future possibility to improve healthcare  
39 in a wider way and facilitate learning in practice.

40  
41 Generally, the investigations lacked the perspectives of the patients and an analysis of the suicide  
42 process over time in connection with the complexity of healthcare organizations. Future research  
43 should examine if application of a framework based on knowledge of the suicide process, strategies of  
44 suicide prevention, and patient safety would enable more sophisticated investigations facilitating  
45 progress in work on the prevention of suicide.

1

## 2 Acknowledgements

3 The authors are grateful to Region Jönköpings county and Futurum for funding and to Public Health  
4 Agency of Sweden for support.

## 5 Authors' contributor statement

6 ERaH designed the study, collected and registered the data, made the first analyses and wrote the  
7 manuscript. BAG, AR and ÅW contributed to the study design, analyses of the data and revisions of  
8 the manuscript. All authors read and approved the final manuscript.

## 9 Competing interests

10 The authors declare that they have no competing interests.

## 11 Funding

12 This study was funded by Futurum, the research center at Region Jönköping county.

## 13 Data sharing statement

14 The complete coding scheme is available by e-mailing [elin.roos.af.hjelmsater@rjl.se](mailto:elin.roos.af.hjelmsater@rjl.se).

## 15 REFERENCES

- 16 1 [WHO](http://www.who.int/mental_health/prevention/suicide/suicideprevent/en/). Suicide data. 2018.  
17 [http://www.who.int/mental\\_health/prevention/suicide/suicideprevent/en/](http://www.who.int/mental_health/prevention/suicide/suicideprevent/en/) (accessed 17 October  
18 2018)
- 19 2 Beskow J. The prevention of suicide while in psychiatric care. *Acta Psychiatr Scand Suppl*  
20 1987;336:66-75.
- 21 3 Luoma JB, Martin CE, Pearson JL. Contact with mental health and primary care providers  
22 before suicide: a review of the evidence. *Am J Psychiatry* 2002;159:909-16. doi:  
23 10.1176/appi.ajp.159.6.909
- 24 4 Qin P, Nordentoft M. Suicide risk in relation to psychiatric hospitalization: evidence based on  
25 longitudinal registers. *Arch Gen Psychiatry* 2005;62:427-32. doi: 10.1001/archpsyc.62.4.427
- 26 5 Cavanagh JT, Carson AJ, Sharpe M, et al. Psychological autopsy studies of suicide: a  
27 systematic review. *Psychol Med* 2003;33:395-405. doi:10.1017/s0033291702006943
- 28 6 Wasserman D, Rihmer Z, Rujescu D, et al. The European Psychiatric Association (EPA)  
29 guidance on suicide treatment and prevention. *Eur Psychiatry* 2012;27:129-41. doi:  
30 10.1016/j.eurpsy.2011.06.003
- 31 7 Zalsman G, Hawton K, Wasserman D, et al. Suicide prevention strategies revisited: 10-year  
32 systematic review. *Lancet Psychiatry* 2016;3:646-59. doi: 10.1016/s2215-0366(16)30030-x
- 33 8 Socialstyrelsen. 2018. <https://www.socialstyrelsen.se/register/dodsorsaksregistret> (accessed 17  
34 October 2018)
- 35 9 Socialstyrelsen. Själv mord 2006-2008 anmälda enligt Lex Maria. Stockholm, 2007.
- 36 10 Vincent C, Amalberti R. Safety in healthcare is a moving target. *BMJ Qual Saf* 2015;24:539-  
37 40. doi: 10.1136/bmjqs-2015-004403
- 38 11 Stanhope N, Crowley-Murphy M, Vincent C, et al. An evaluation of adverse incident  
39 reporting. *J Eval Clin Pract* 1999;5:5-12. doi: 10.1046/j.1365-2753.1999.00146.x
- 40 12 Reason J. Human error: models and management. *BMJ* 2000;320:768-70. doi:  
41 10.1136/bmj.320.7237.768
- 42 13 Braithwaite J, Wears RL, Hollnagel E. Resilient health care: turning patient safety on its head.  
43 *Int J Qual Health Care* 2015;27:418-20. doi: 10.1093/intqhc/mzv063

- 1  
2  
3 1 14 Macrae C. The problem with incident reporting. *BMJ Qual Saf* 2016;25:71-5. doi:  
4 2 10.1136/bmjqs-2015-004732
- 5 3 15 Mitchell I, Schuster A, Smith K, et al. Patient safety incident reporting: a qualitative study of  
6 4 thoughts and perceptions of experts 15 years after 'To Err is Human'. *BMJ Qual Saf*  
7 5 2016;25:92-9. doi: 10.1136/bmjqs-2015-004405
- 8 6 16 Kellogg KM, Hettinger Z, Shah M, et al. Our current approach to root cause analysis: is it  
9 7 contributing to our failure to improve patient safety? *BMJ Qual Saf* 2017;26:381-87. doi:  
10 8 10.1136/bmjqs-2016-005991
- 11 9 17 Wu AW, Lipshutz AK, Pronovost PJ. Effectiveness and efficiency of root cause analysis in  
12 10 medicine. *JAMA* 2008;299:685-7. doi: 10.1001/jama.299.6.68
- 13 11 18 Wrigstad J, Begström J, Gustafsson P. Mind the gap between recommendation and  
14 12 implementation—principles and lessons in the aftermath of incident investigations: a semi-  
15 13 quantitative and qualitative study of factors leading to the successful implementation of  
16 14 recommendations. *BMJ Open* 2014;4:e005326. doi: 10.1136/bmjopen-2014-005326
- 17 15 19 The Swedish Patient Safety Act (SFS 2010:659). [https://www.riksdagen.se/sv/dokument-lagar/dokument/svensk-forfattningssamling/patientsakerhetslag-2010659\\_sfs-2010-659](https://www.riksdagen.se/sv/dokument-lagar/dokument/svensk-forfattningssamling/patientsakerhetslag-2010659_sfs-2010-659).  
18 16 (accessed 2 February 2019)
- 19 17 20 Sveriges Kommuner och Landsting. Riskanalys och händelseanalys Vol 3. Stockholm:  
20 18 Sveriges Kommuner och Landsting; 2015.
- 21 19 21 Nelson EC, Batalden PB, Godfrey MM. Quality by design: a clinical microsystems approach.  
22 20 San Fransisco: Jossey-Bass; 2007.
- 23 21 22 Mann JJ, Apter A, Bertolote J, et al. Suicide prevention strategies: a systematic review. *JAMA*  
24 22 2005;294:2064-74. doi: 10.1001/jama.294.16.2064
- 25 23 23 Panesar SS, deSilva D, Carson-Stevens A, et al. How safe is primary care? A systematic  
26 24 review. *BMJ Qual Saf* 2016;25:544-53. doi: 10.1136/bmjqs-2015-004178
- 27 25 24 Schiff GD, Kim S, Abrams R, et al. Diagnosing diagnosis errors: lessons from a multi-  
28 26 institutional collaborative project. In: Henriksen K, Battles JB, Marks ES, et al., eds. *Advances*  
29 27 *in Patient Safety: From Research to Implementation (Volume 2: Concepts and Methodology)*.  
30 28 Rockville MD: Agency for Healthcare Reserach and Quality; 2005.
- 31 29 25 Sveriges Kommuner och Landsting. SKL:s verksamhetstabeller 2007-2016. Stockholm:  
32 30 Sveries Kommuner och Landsting; 2016.  
33 31 <https://skl.se/ekonomijuridikstatistik/statistik/ekonomiochverksamhetsstatistik/landstingekonomiochverksamhet.1342.html>. (accessed 18 March 2019)
- 34 32 26 Rihmer Z, Belsö N, Kalmar S. Antidepressants and suicide prevention in Hungary. *Acta*  
35 33 *Psychiatr Scand* 2001;103:238-39
- 36 34 27 Rutz W. Preventing suicide and premature death by education and treatment. *J Affect Disord*  
37 35 2001;62:123-29. doi: 10.1016/s0165-0327(00)00356-6
- 38 36 28 Rutz W, von Knorring L, Wahlinder J. Frequency of suicide on Gotland after systematic  
39 37 postgraduate education of general practitioners. *Acta Psychiatr Scand* 1989;80:151-54. doi:  
40 38 10.1111/j.1600-0447.1989.tb01318.x
- 41 39 29 Roskar S, Podlesek A, Zorko M, et al. Effects of training program on recognition and  
42 40 management of depression and suicide risk evaluation for Slovenian primary-care physicians:  
43 41 follow-up study. *Croat Med J* 2010;51:237-42. doi: 10.3325/cmj.2010.51.237
- 44 42 30 Szanto K, Kalmar S, Hendin H, et al. A suicide prevention program in a region with a very  
45 43 high suicide rate. *Arch Gen Psychiatry* 2007;64:914-20. doi: 10.1001/archpsyc.64.8.914
- 46 44 31 Macrae C. Remembering to learn: the overlooked role of remembrance in safety improvement.  
47 45 *BMJ Qual Saf* 2017;26:678-82. doi: 10.1136/bmjqs-2016-005547
- 48 46 32 Vincent C, Carthey J, Macrae C, et al. Safety analysis over time: seven major changes to  
49 47 adverse event investigation. *Implement Sci* 2017;12:151. doi: 10.1186/s13012-017-0695-4
- 50 48 33 Jayaram G. Inpatient suicide prevention: promoting a culture and system of safety over 30  
51 49 years of practice. *J Psychiatr Pract* 2014;20:392-404. doi:  
52 50 10.1097/01.pra.0000453369.71092.69
- 53 51 34 Mills PD, Neily J, Kinney LM, et al. Effective interventions and implementation strategies to  
54 52 reduce adverse drug events in the Veterans Affairs (VA) system. *Qual Saf Health Care*  
55 53 2008;17:37-46.  
56 54  
57 55  
58  
59  
60

1  
2  
3  
4  
5  
6  
7  
8  
9  
10  
11  
12  
13  
14  
15  
16  
17  
18  
19  
20  
21  
22  
23  
24  
25  
26  
27  
28  
29  
30  
31  
32  
33  
34  
35  
36  
37  
38  
39  
40  
41  
42  
43  
44  
45  
46  
47  
48  
49  
50  
51  
52  
53  
54  
55  
56  
57  
58  
59  
60

- 1 35 Mills PD, Neily J, Luan D, et al. Actions and implementation strategies to reduce suicidal  
2 events in the Veterans Health Administration. *Jt Comm J Qual Patient Saf* 2006;32:130-41.  
3 doi: 10.1136/qshc.2006.021816
- 4 36 Weick KE, Sutcliffe KM. Managing the unexpected: Resilient performance in an age of  
5 uncertainty. New York: John Wiley & Sons; 2011.
- 6 37 Palmér S. Blev det någon verkstad? Bidrar lex Maria och lex Sarah till säkrare vård och  
7 omsorg? Stockholm; 2016. [https://www.ivo.se/publicerat-material/rapporter/blev-det-nagon-](https://www.ivo.se/publicerat-material/rapporter/blev-det-nagon-verkstad/)  
8 [verkstad/](https://www.ivo.se/publicerat-material/rapporter/blev-det-nagon-verkstad/)
- 9 38 Vincent CA. Analysis of clinical incidents: a window on the system not a search for root  
10 causes. *Qual Saf Health Care* 2004;13:242-3. doi: 10.1136/qhc.13.4.242
- 11 39 Taitz J, Genn K, Brooks V, et al. System-wide learning from root cause analysis: a report from  
12 the New South Wales Root Cause Analysis Review Committee. *Qual Saf Health Care*  
13 2010;19:e63. doi: 10.1136/qshc.2008.032144
- 14 40 Dekker S, Cilliers, P, Hofmeyr, J-H. The complexity of failure: Implications of complexity  
15 theory for safety investigations. *Saf Sci* 2011;49:939-45. doi: 10.1016/j.ssci.2011.01.008
